# Supplementary material for: Multimodal Metagenomic Profiling of Bronchoalveolar Lavage Fluid for Diagnostic Classification of Pulmonary Diseases
Source: Research Square preprint supplement (doi:10.21203/rs.3.rs-6108429/v1), 2025-03-03
Supplement: Supplementary file 2 [file 7aeb175b4c1f594860e9f869.xlsx]

## Sheet: Data S1
Data S1. Microbiological results and malignancy diagnosis by cytology/flow cytometry/Pathological results of pulmonary disease patients
Patients ID	Library ID	Collecation Date	mNGS DNA Pathogen_Reads number	mNGS RNA Pathogen_Reads number	BAL microbiology	Genexpert	TSPOT	Diagnosis	Data Sets	Cytology/Flow Cytometry/ Pathological Subtype	Stage of disease at initial diagnosis	Genomic Mutant	Smoking Status
20211215MCX012	ZY3498	20211215	Acinetobacter_baumannii_1,118	Acinetobacter_baumannii_3,611	Acinetobacter_baumannii	Negative	Negative	Bacterial infection	Validation Cohort	Negative	NA	NA	No history of smoking
20210820MCX014	ZY1869	20210820	Haemophilus_influenzae_901	Negative	Negative	Negative	Negative	Bacterial infection	Training Cohort	Negative	NA	NA	No history of smoking
20210907MCX021	ZY2107	20210907	Klebsiella_pneumoniae_59Stenotrophomonas_maltophilia_87	Negative	Stenotrophomonas_maltophilia	Negative	Negative	Bacterial infection	Training Cohort	Negative	NA	NA	No history of smoking
20220210MCX018	ZY4295	20220210	Rothia_mucilaginosus_10,160, Treponema_denticola_3,810, Fusobacterium_nucleatum_1,884, Porphyromonas_gingivalis_3,783, Parvimonas_micra_296, Staphylococcus_aureus_301, Filifactor_alocis 288	Treponema_denticola_514Porphyromonas_gingivalis_689Fusobacterium_nucleatum_146Parvimonas_micra_332	Negative	Negative	Negative	Bacterial infection	Validation Cohort	Negative	NA	NA	No history of smoking
20220319MCX007	ZY4898	20220319	Klebsiella_pneumoniae_836	Negative	Negative	Negative	Negative	Bacterial infection	Validation Cohort	Negative	NA	NA	No history of smoking
20211215MCX006	ZY3492	20211215	Staphylococcus_aureus_249	Negative	Negative	Negative	Negative	Bacterial infection	Validation Cohort	Negative	NA	NA	No history of smoking
20211218MCX005	ZY3539	20211218	Prevotella_9,236, Fusobacterium_nucleatum_1,061, Streptococcus_oralis_761	Prevotella_12,830, Fusobacterium_nucleatum_1,383, Streptococcus_oralis_167	Prevotella_	Negative	Negative	Bacterial infection	Validation Cohort	Negative	NA	NA	No history of smoking
20211229MCX017	ZY3696	20211229	Streptococcus_pneumoniae_12	Negative	Streptococcus_pneumoniae	Negative	Negative	Bacterial infection	Validation Cohort	Negative	NA	NA	History of smoking
20211117MCX016	ZY3110	20211117	Staphylococcus_aureus_3,295	Negative	Staphylococcus_aureus	Negative	Negative	Bacterial infection	Training Cohort	Negative	NA	NA	History of smoking
20210429MCX006	ZY570	20210429	Fusobacterium_nucleatum_16,972,Filifactor_alocis 10,178, Streptococcus_mitis_77, Parvimonas_micra_334	Fusobacterium_nucleatum_1,305	Negative	Negative	Negative	Bacterial infection	Training Cohort	Negative	NA	NA	History of smoking
20210728MCX008	ZY1533	20210728	Staphylococcus_aureus_3710	Staphylococcus_aureus_836	Staphylococcus_aureus	Negative	Negative	Bacterial infection	Training Cohort	Negative	NA	NA	No history of smoking
20220105MCX008	ZY3780	20220105	Haemophilus_influenzae_10,389	Haemophilus_influenzae_15,837	Negative	Negative	Negative	Bacterial infection	Validation Cohort	Negative	NA	NA	No history of smoking
20210622MCX005	ZY1106	20210622	Streptococcus_oralis_20,713, Pyramidobacter_piscolens_24,878, Peptostreptococcaceae_bacterium_oral_taxon_11315,967, Porphyromonas_gingivalis_10,086, Parvimonas_micra_6,142	Treponema_denticola_3,508, Prevotella_3,003, Porphyromonas_gingivalis_2,412	Negative	Negative	Negative	Bacterial infection	Training Cohort	Negative	NA	NA	History of smoking
20210316MCX006	ZY164	20210316	Pseudomonas_aeruginosa_92，Nocardia_5	Negative	Negative	Negative	Negative	Bacterial infection	Training Cohort	Negative	NA	NA	No history of smoking
20210807MCX009	ZY1670	20210807	Pseudomonas_aeruginosa_19,007	Pseudomonas_aeruginosa_1,471	Pseudomonas_aeruginosa	Negative	Negative	Bacterial infection	Training Cohort	Negative	NA	NA	No history of smoking
20220301MCX019	ZY4588	20220301	Haemophilus_influenzae_3,575	Haemophilus_influenzae_8,312	Negative	Negative	Negative	Bacterial infection	Validation Cohort	Negative	NA	NA	No history of smoking
20211125MCX009	ZY3224	20211125	Streptococcus_pneumoniae_13	Negative	Streptococcus_pneumoniae	Negative	Negative	Bacterial infection	Validation Cohort	Negative	NA	NA	History of smoking
20210402MCX009	ZY315	20210402	Staphylococcus_aureus_8650	Negative	Negative	Negative	Negative	Bacterial infection	Training Cohort	Negative	NA	NA	History of smoking
20210903MCX010	ZY2044	20210903	Legionella_pneumophila_71	Legionella_pneumophila_17	Negative	Negative	Negative	Bacterial infection	Training Cohort	Negative	NA	NA	History of smoking
20220112MCX018	ZY3900	20220112	Porphyromonas_gingivalis_1,029, Campylobacter_rectus_111	Negative	Negative	Negative	Negative	Bacterial infection	Validation Cohort	Negative	NA	NA	History of smoking
20210915MCX009	ZY2232	20210915	Haemophilus_influenzae_3,179	Haemophilus_influenzae_312	Haemophilus_influenzae	Negative	Negative	Bacterial infection	Training Cohort	Negative	NA	NA	History of smoking
20211022MCX007	ZY2703	20211022	Serratia_marcescens_5,347, Staphylococcus_aureus_56	Negative	Serratia_marcescens	Negative	Negative	Bacterial infection	Training Cohort	Negative	NA	NA	No history of smoking
20211022MCX013	ZY2709	20211022	Pseudomonas_aeruginosa_21,128	Pseudomonas_aeruginosa_1,337	Pseudomonas_aeruginosa	Negative	Negative	Bacterial infection	Training Cohort	Negative	NA	NA	History of smoking
20210607MCX008	ZY960	20210607	Actinomycetes_10,368, Porphyromonas_5,520, Fusobacterium_periodonticum_2,354, Parvimonas_micra_1,067	Negative	Negative	Negative	Negative	Bacterial infection	Training Cohort	Negative	NA	NA	No history of smoking
20210906MCX013	ZY2080	20210906	Fusobacterium_nucleatum_2,159, Prevotella_2,845, Campylobacter_348	Fusobacterium_nucleatum_3,098, Prevotella_2,178, Campylobacter_935	Negative	Negative	Negative	Bacterial infection	Training Cohort	Negative	NA	NA	History of smoking
20211004MCX024	ZY2436	20211004	Porphyromonas_gingivalis_2,306, Neisseria_subflava_307, Filifactor_alocis_583, Prevotella_intermedius_421, Campylobacter_rectus_344, Fusobacterium_nucleatum_206, Fusarium_asiaticum_12	Negative	Negative	Negative	Negative	Bacterial infection	Training Cohort	Negative	NA	NA	History of smoking
20211223MCX009	ZY3599	20211223	Tannerella_forsythensis_363	Tannerella_forsythensis_630	Negative	Negative	Negative	Bacterial infection	Validation Cohort	Negative	NA	NA	History of smoking
20210427MCX009	ZY545	20210427	Pseudomonas_aeruginosa_84	Negative	Pseudomonas_aeruginosa	Negative	Negative	Bacterial infection	Training Cohort	Negative	NA	NA	No history of smoking
20210427MCX011	ZY547	20210427	Treponema_denticola_554Campylobacter_rectus_155Streptococcus_constellatus_30Fusobacterium_nucleatum_72	Negative	Negative	Negative	Negative	Bacterial infection	Training Cohort	Negative	NA	NA	History of smoking
20210811MCX009	ZY1727	20210811	Prevotella_5,432, Streptococcus_oralis_2,092	Prevotella_96	Negative	Negative	Negative	Bacterial infection	Training Cohort	Negative	NA	NA	History of smoking
20210729MCX010	ZY1548	20210729	Pseudomonas_aeruginosa_804, Parvimonas_micra_128, Tannerella_forsythensis_268, Prevotella_198	Tannerella_forsythensis_895Parvimonas_micra_215	Pseudomonas_aeruginosa	Negative	Negative	Bacterial infection	Training Cohort	Negative	NA	NA	No history of smoking
20210629MCX008	ZY1190	20210629	Klebsiella_pneumoniae_757,Stenotrophomonas_maltophilia_236	Negative	Negative	Negative	Negative	Bacterial infection	Training Cohort	Negative	NA	NA	History of smoking
20220122MCX010	ZY4065	20220122	Fusobacterium_nucleatum_322, Rothia_mucilaginosus_74	Negative	Negative	Negative	Negative	Bacterial infection	Validation Cohort	Negative	NA	NA	History of smoking
20210517MCX008	ZY711	20210517	Parvimonas_micra_10	Negative	Negative	Negative	Negative	Bacterial infection	Training Cohort	Negative	NA	NA	History of smoking
20210727MCX015	ZY1523	20210727	Klebsiella_pneumoniae_142	KlEBV_siella_pneumoniae_174	Klebsiella_pneumoniae	Negative	Negative	Bacterial infection	Training Cohort	Negative	NA	NA	History of smoking
20211012MCX016	ZY2539	20211012	Klebsiella_pneumoniae_991, Pseudomonas_aeruginosa_123	Klebsiella_pneumoniae_2,689, Pseudomonas_aeruginosa_244	Klebsiella_pneumoniae	Negative	Negative	Bacterial infection	Training Cohort	Negative	NA	NA	History of smoking
20210227MCX003	ZY48	20210227	Tropheryma_whipplei_3571, Acinetobacter_baumannii_20	Negative	Acinetobacter_baumannii	Negative	Negative	Bacterial infection	Training Cohort	Negative	NA	NA	No history of smoking
20210726MCX012	ZY1505	20210726	Porphyromonas_gingivalis_1,118, Treponema_denticola_356, Campylobacter_256Filifactor_alocis 100	Porphyromonas_gingivalis_2,277, Campylobacter_596, Filifactor_alocis 80, Tannerella_forsythensis_46	Negative	Negative	Negative	Bacterial infection	Training Cohort	Negative	NA	NA	No history of smoking
20211021MCX010	ZY2689	20211021	Haemophilus_influenzae_3,350	Haemophilus_influenzae_3,842	Negative	Negative	Negative	Bacterial infection	Training Cohort	Negative	NA	NA	No history of smoking
20210412MCX007	ZY398	20210412	Acinetobacter_baumannii_74908，Streptococcus_pneumoniae_1045，	Streptococcus_pneumoniae_13	Acinetobacter_baumannii	Negative	Negative	Bacterial infection	Training Cohort	Negative	NA	NA	History of smoking
20210603MCX015	ZY914	20210603	arvimonas_micra_5,839, Porphyromonas_gingivalis_6,582, Campylobacter_671	Porphyromonas_gingivalis_386, Campylobacter_290	Negative	Negative	Negative	Bacterial infection	Training Cohort	Negative	NA	NA	History of smoking
20210703MCX010	ZY1244	20210703	Porphyromonas_gingivalis_18,189, Campylobacter_684, Treponema_denticola_287, Streptococcus_constellatus_41, Prevotella_12, Fusobacterium_nucleatum_44	Porphyromonas_gingivalis_8,672, Campylobacter_1,602	Negative	Negative	Negative	Bacterial infection	Training Cohort	Negative	NA	NA	History of smoking
20220224MCX007	ZY4508	20220224	Streptococcus_pneumoniae_50Haemophilus_influenzae_88Pseudomonas_aeruginosa_55	Pseudomonas_aeruginosa_89, Haemophilus_influenzae_327, Streptococcus_pneumoniae_3	Negative	Negative	Negative	Bacterial infection	Validation Cohort	Negative	NA	NA	History of smoking
20210313MCX003	ZY148	20210313	Staphylococcus_aureus_1334581, Mycobacterium_intracellulare_51	Staphylococcus_aureus_2800	Negative	Negative	Negative	Bacterial infection	Training Cohort	Negative	NA	NA	No history of smoking
20210507MCX013	ZY634	20210507	Negative	Negative	Negative	Negative	Negative	Bacterial infection	Training Cohort	Negative	NA	NA	No history of smoking
20211216MCX009	ZY3509	20211216	Porphyromonas_gingivalis_1,715, Tannerella_forsythensis_1,991, Campylobacter_rectus_736, Fusobacterium_nucleatum_136, Streptococcus_anginosus_99	Porphyromonas_gingivalis_17,884, Campylobacter_rectus_4,001, Tannerella_forsythensis_7,002, Fusobacterium_nucleatum_1,680, Streptococcus_anginosus_24	Negative	Negative	Negative	Bacterial infection	Validation Cohort	Negative	NA	NA	No history of smoking
20210625MCX009	ZY1151	20210625	Klebsiella_pneumoniae_1,021	Negative	Klebsiella_pneumoniae	Negative	Negative	Bacterial infection	Training Cohort	Negative	NA	NA	History of smoking
220610MCX00019	ZY6420	20220610	Stenotrophomonas_maltophilia_259	Stenotrophomonas_maltophilia_57	Stenotrophomonas_maltophilia	Negative	Negative	Bacterial infection	Validation Cohort	Negative	NA	NA	History of smoking
20210916MCX006	ZY2245	20210916	Pseudomonas_aeruginosa_7,400	Negative	Pseudomonas_aeruginosa	Negative	Negative	Bacterial infection	Training Cohort	Negative	NA	NA	No history of smoking
20220318MCX013	ZY4888	20220318	Pseudomonas_aeruginosa_1,630, Candida glabrata_234	Negative	Negative	Negative	Negative	Bacterial infection	Validation Cohort	Negative	NA	NA	No history of smoking
20210821MCX012	ZY1887	20210821	Mycobacterium_intracellulare_73	Negative	Negative	Negative	Negative	Bacterial infection	Training Cohort	Negative	NA	NA	History of smoking
20220319MCX015	ZY4906	20220319	Streptococcus_anginosus_111	Streptococcus_anginosus_9	Negative	Negative	Negative	Bacterial infection	Validation Cohort	Negative	NA	NA	History of smoking
20211123MCX010	ZY3186	20211123	Burkholderia_multivorans_248	Negative	Burkholderia_multivorans	Negative	Negative	Bacterial infection	Validation Cohort	Negative	NA	NA	No history of smoking
20210618MCX006	ZY1068	20210618	Porphyromonas_gingivalis_7,696, Peptostreptococcaceae_bacterium_oral_taxon_1131,772, Campylobacter_798, Treponema_denticola_818, Prevotella_145, Prevotella_145	Porphyromonas_gingivalis_1,420, Campylobacter_1,282	Negative	Negative	Negative	Bacterial infection	Training Cohort	Negative	NA	NA	History of smoking
20210821MCX014	ZY1889	20210821	Burkholderia_multivorans_1,827	Negative	Burkholderia_multivorans	Negative	Negative	Bacterial infection	Training Cohort	Negative	NA	NA	No history of smoking
20210420MCX006	ZY476	20210420	Parvimonas_micra_4786, Prevotella_175	Negative	Candida_albicans	Negative	Negative	Bacterial infection	Training Cohort	Negative	NA	NA	No history of smoking
20210805MCX008	ZY1637	20210805	Tropheryma_whipplei_459Pseudomonas_aeruginosa_62	Negative	Negative	Negative	Negative	Bacterial infection	Training Cohort	Negative	NA	NA	No history of smoking
20210825MCX010	ZY1934	20210825	Staphylococcus_aureus_59,369	Negative	Staphylococcus_aureus	Negative	Negative	Bacterial infection	Training Cohort	Negative	NA	NA	No history of smoking
20211117MCX015	ZY3109	20211117	Negative	Negative	Klebsiella_pneumoniae	Negative	Negative	Bacterial infection	Training Cohort	Negative	NA	NA	No history of smoking
20211116MCX012	ZY3087	20211116	Pseudomonas_aeruginosa_40,683	Pseudomonas_aeruginosa_20,670	Pseudomonas_aeruginosa	Negative	Negative	Bacterial infection	Training Cohort	Negative	NA	NA	No history of smoking
20210604MCX008	ZY929	20210604	Parvimonas_micra_871, Streptococcus_constellatus_145, Porphyromonas_gingivalis_395, Prevotella_157, Filifactor_alocis 123	Negative	Negative	Negative	Negative	Bacterial infection	Training Cohort	Negative	NA	NA	History of smoking
20211103MCX004	ZY2877	20211103	Streptococcus_pseudopneumoniae_2,916, Pseudomonas_aeruginosa_1,306	Streptococcus_pseudopneumoniae_109	Negative	Negative	Negative	Bacterial infection	Training Cohort	Negative	NA	NA	History of smoking
20211204MCX005	ZY3358	20211204	Acinetobacter_baumannii_39,760	Acinetobacter_baumannii_12,549	Acinetobacter_baumannii	Negative	Negative	Bacterial infection	Validation Cohort	Negative	NA	NA	History of smoking
20210813MCX011	ZY1761	20210813	Klebsiella_pneumoniae_1,362	Klebsiella_pneumoniae_167	Negative	Negative	Negative	Bacterial infection	Training Cohort	Negative	NA	NA	No history of smoking
20220127MCX022	ZY4140	20220127	Tannerella_forsythensis_56,145, Pyramidobacter_piscolens_13,622, Porphyromonas_gingivalis_2,693, Campylobacter_rectus_2,269, Parvimonas_micra_1,235, Filifactor_alocis_859, Streptococcus_oralis_698, Pseudomonas_aeruginosa_385	Pyramidobacter_piscolens_49,415, Tannerella_forsythensis_13,173, Porphyromonas_gingivalis_2,788	Pseudomonas_aeruginosa	Negative	Negative	Bacterial infection	Validation Cohort	Negative	NA	NA	No history of smoking
20210820MCX015	ZY1870	20210820	Haemophilus_parainfluenzae_2,523	Haemophilus_parainfluenzae_1,368	Negative	Negative	Negative	Bacterial infection	Training Cohort	Negative	NA	NA	History of smoking
20211101MCX015	ZY2851	20211101	Streptococcus_pneumoniae_29,826, Haemophilus_influenzae_6,532, Moraxella_catarrhalis_11,915	Haemophilus_influenzae_2,276, Moraxella_catarrhalis_6,995, Streptococcus_pneumoniae_215	Streptococcus_pneumoniae	Negative	Negative	Bacterial infection	Training Cohort	Negative	NA	NA	History of smoking
20211223MCX008	ZY3598	20211223	Porphyromonas_gingivalis_17,136, Treponema_denticola_1,744, Streptococcus_constellatus_942, Campylobacter_rectus_1,237	Campylobacter_rectus_123, Streptococcus_constellatus_8, Porphyromonas_gingivalis_50	Acinetobacter_baumannii	Negative	Negative	Bacterial infection	Validation Cohort	Negative	NA	NA	No history of smoking
220623MCX00022	ZY6660	20220623	Porphyromonas_gingivalis_14,554, Prevotella_intermedius_9,321, Fusobacterium_periodonticum_1,359, Fusobacterium_nucleatum_627, Parvimonas_micra_939, Filifactor_alocis 627, Tannerella_forsythensis_678	Porphyromonas_gingivalis_4,332, Fusobacterium_nucleatum_1,895, Prevotella_intermedius_2,842, Parvimonas_micra_748, Tannerella_forsythensis_594	Negative	Negative	Negative	Bacterial infection	Validation Cohort	Negative	NA	NA	No history of smoking
20210924MCX012	ZY2340	20210924	Mycobacterium_abscessus_24	Negative	Negative	Negative	Negative	Bacterial infection	Training Cohort	Negative	NA	NA	No history of smoking
20211028MCX025	ZY2808	20211028	Legionella_feeleii_21	Negative	Actinomycetes	Negative	Negative	Bacterial infection	Training Cohort	Negative	NA	NA	No history of smoking
20220322MCX015	ZY4939	20220322	Pseudomonas_aeruginosa_760	Negative	Candida_albicans, Pseudomonas_aeruginosa	Negative	Negative	Bacterial infection	Validation Cohort	Negative	NA	NA	History of smoking
20210929MCX011	ZY2399	20210929	Porphyromonas_gingivalis_508, Streptococcus_constellatus_105, Fusobacterium_nucleatum_63	Porphyromonas_gingivalis_315, Fusobacterium_nucleatum_38, Streptococcus_constellatus_10	Negative	Negative	Negative	Bacterial infection	Training Cohort	Negative	NA	NA	No history of smoking
20210318MCX014	ZY189	20210318	Pseudomonas_aeruginosa_93241, Tropheryma_whipplei_6	Pseudomonas_aeruginosa_2782	Negative	Negative	Negative	Bacterial infection	Training Cohort	Negative	NA	NA	No history of smoking
20210827MCX011	ZY1963	20210827	Mycobacterium_intracellulare_43	Negative	Negative	Negative	Negative	Bacterial infection	Training Cohort	Negative	NA	NA	No history of smoking
20211230MCX012	ZY3711	20211230	Haemophilus_influenzae_21	Negative	Haemophilus_influenzae	Negative	Negative	Bacterial infection	Validation Cohort	Negative	NA	NA	No history of smoking
20210609MCX005	ZY980	20210609	Prevotella_veroralis_280, Veillonella_parvula_195, Streptococcus_oralis_286, Parvimonas_micra_159	Negative	Candida_tropicalis	Negative	Negative	Bacterial infection	Training Cohort	Negative	NA	NA	History of smoking
20211019MCX022	ZY2657	20211019	Porphyromonas_gingivalis_194,554, Tannerella_forsythensis_8,038, Prevotella_intermedius_651, Campylobacter_rectus_2,542, Fusobacterium_nucleatum_441	Porphyromonas_gingivalis_33,874, Campylobacter_rectus_2,134, Fusobacterium_nucleatum_546, Tannerella_forsythensis_420	Acinetobacter_baumannii	Negative	Negative	Bacterial infection	Training Cohort	Negative	NA	NA	History of smoking
20220305MCX010	ZY4658	20220305	Pseudomonas_aeruginosa_15,859	Pseudomonas_aeruginosa_22,796	Pseudomonas_aeruginosa	Negative	Negative	Bacterial infection	Validation Cohort	Negative	NA	NA	History of smoking
20211012MCX008	ZY2531	20211012	Mycobacterium_intracellulare_22	Negative	Mycobacterium	Negative	Negative	Bacterial infection	Training Cohort	Negative	NA	NA	No history of smoking
20220119MCX020	ZY4024	20220119	Porphyromonas_gingivalis_3,202, Treponema_denticola_1,595, Streptococcus_oralis_578, Parvimonas_micra_247	Porphyromonas_gingivalis_2,454, Treponema_denticola_1,833, Parvimonas_micra_185Streptococcus_oralis_93	Negative	Negative	Negative	Bacterial infection	Validation Cohort	Negative	NA	NA	History of smoking
20210705MCX013	ZY1260	20210705	Streptococcus_intermedius_39,724, Prevotella_31,099, Rothia_mucilaginosus_36,514, Porphyromonas_13,616, Fusobacterium_periodonticum_6,090, Parvimonas_micra_3,005	Prevotella_1,851	Negative	Negative	Negative	Bacterial infection	Training Cohort	Negative	NA	NA	History of smoking
20211106MCX005	ZY2936	20211106	Burkholderia_cenocepacia_681, Pseudomonas_aeruginosa_599, Stenotrophomonas_maltophilia_436, Acinetobacter_baumannii_66, Klebsiella_pneumoniae_8	Negative	Burkholderia_cenocepacia, Klebsiella_pneumoniae	Negative	Negative	Bacterial infection	Training Cohort	Negative	NA	NA	History of smoking
20211124MCX016	ZY3207	20211124	Pseudomonas_aeruginosa_5,608, Streptococcus_pneumoniae_346	Negative	Negative	Negative	Negative	Bacterial infection	Validation Cohort	Negative	NA	NA	History of smoking
20220308MCX015	ZY4689	20220308	Haemophilus_influenzae_317	Haemophilus_influenzae_245	Negative	Negative	Negative	Bacterial infection	Validation Cohort	Negative	NA	NA	History of smoking
20210707MCX007	ZY1287	20210707	Pseudomonas_aeruginosa_33552	Pseudomonas_aeruginosa_7295	Negative	Negative	Negative	Bacterial infection	Training Cohort	Negative	NA	NA	No history of smoking
20210421MCX013	ZY491	20210421	Streptococcus_pseudopneumoniae_4,430, Pseudomonas_aeruginosa_1,030	Streptococcus_pseudopneumoniae_683	Pseudomonas_aeruginosa	Negative	Negative	Bacterial infection	Training Cohort	Negative	NA	NA	History of smoking
20210806MCX011	ZY1658	20210806	Fusobacterium_nucleatum_5,820, Treponema_denticola_7,708, Filifactor_alocis 1,963	Fusobacterium_nucleatum_5,741, Treponema_denticola_5,236, Campylobacter_564, Filifactor_alocis 198	Pseudomonas_aeruginosa	Negative	Negative	Bacterial infection	Training Cohort	Negative	NA	NA	History of smoking
20211120MCX006	ZY3159	20211120	Pseudomonas_aeruginosa_17,234	Pseudomonas_aeruginosa_10,489	Pseudomonas_aeruginosa	Negative	Negative	Bacterial infection	Training Cohort	Negative	NA	NA	No history of smoking
20210626MCX008	ZY1166	20210626	Escherichia_coli_4707, Klebsiella_pneumoniae_327	Escherichia_coli_289, Klebsiella_pneumoniae_22	Klebsiella_pneumoniae	Negative	Negative	Bacterial infection	Training Cohort	Negative	NA	NA	History of smoking
20211026MCX022	ZY2765	20211026	Pyramidobacter_piscolens_5,102, Porphyromonas_gingivalis_2,509, Parvimonas_micra_534, Prevotella_intermedius_141	Negative	Negative	Negative	Negative	Bacterial infection	Training Cohort	Negative	NA	NA	History of smoking
20220111MCX017	ZY3876	20220111	Burkholderia_cenocepacia_8,163, Elizabethkingia_1,117, Acinetobacter_baumannii_483	Burkholderia_cenocepacia_1,213, Elizabethkingia_51	Burkholderia_cenocepacia, Flavobacterium_meningosepticum	Negative	Negative	Bacterial infection	Validation Cohort	Negative	NA	NA	No history of smoking
20211004MCX022	ZY2431	20211004	Klebsiella_pneumoniae_511	Negative	Klebsiella_pneumoniae	Negative	Negative	Bacterial infection	Training Cohort	Negative	NA	NA	No history of smoking
20210904MCX014	ZY2063	20210904	Haemophilus_parainfluenzae_4,613	Haemophilus_parainfluenzae_8,161	Negative	Negative	Negative	Bacterial infection	Training Cohort	Negative	NA	NA	History of smoking
20210707MCX008	ZY1288	20210707	Haemophilus_parainfluenzae_9,128, Escherichia_coli_8,959, Stenotrophomonas_maltophilia_6,627, Ureaplasma_Parvum_80	Ureaplasma_Parvum_440	Negative	Negative	Negative	Bacterial infection	Training Cohort	Negative	NA	NA	Unknown
20210804MCX006	ZY1625	20210804	Klebsiella_pneumoniae_55	Negative	Klebsiella_pneumoniae	Negative	Negative	Bacterial infection	Training Cohort	Negative	NA	NA	History of smoking
220406MCX00012	ZY5164	20220406	Legionella_longbeachae_6,940	Legionella_longbeachae_237	Negative	Negative	Negative	Bacterial infection	Validation Cohort	Negative	NA	NA	History of smoking
20210610MCX001	ZY986	20210610	Gemella_haemolysans_16,587, Haemophilus_parainfluenzae_7,963, Porphyromonas_8,434, Fusobacterium_periodonticum_8,352, Staphylococcus_aureus_1,771, Parvimonas_micra_874	Negative	Staphylococcus_aureus	Negative	Negative	Bacterial infection	Training Cohort	Negative	NA	NA	No history of smoking
20210811MCX014	ZY1732	20210811	Staphylococcus_aureus_3,812, Stenotrophomonas_maltophilia_890	Negative	Staphylococcus_aureus, Stenotrophomonas_maltophilia	Negative	Negative	Bacterial infection	Training Cohort	Negative	NA	NA	History of smoking
20210817MCX018	ZY1823	20210817	Pseudomonas_aeruginosa_344	Negative	Negative	Negative	Negative	Bacterial infection	Training Cohort	Negative	NA	NA	No history of smoking
20211224MCX012	ZY3616	20211224	Porphyromonas_gingivalis_2,880, Fusobacterium_nucleatum_232, Prevotella_171	Porphyromonas_gingivalis_11,356, Fusobacterium_nucleatum_412, Campylobacter_rectus_806	Negative	Negative	Negative	Bacterial infection	Validation Cohort	Negative	NA	NA	Unknown
20210429MCX007	ZY571	20210429	Nocardia_654	Negative	Negative	Negative	Negative	Bacterial infection	Training Cohort	Negative	NA	NA	No history of smoking
20210723MCX013	ZY1469	20210723	Pseudomonas_aeruginosa_16,559Mycobacterium_abscessus_137	Pseudomonas_aeruginosa_2,611Mycobacterium_abscessus_13	Pseudomonas_aeruginosa	Negative	Negative	Bacterial infection	Training Cohort	Negative	NA	NA	No history of smoking
20220311MCX014	ZY4765	20220311	Pseudomonas_aeruginosa_3,595, Mycobacterium_intracellulare_16	Pseudomonas_aeruginosa_11,963	Pseudomonas_aeruginosa	Negative	Negative	Bacterial infection	Validation Cohort	Negative	NA	NA	Unknown
20210612MCX010	ZY1023	20210612	Mycobacterium_intracellulare_11	Negative	Negative	Negative	Negative	Bacterial infection	Training Cohort	Negative	NA	NA	No history of smoking
20210720MCX011	ZY1425	20210720	Staphylococcus_aureus_81, Pseudomonas_aeruginosa_11	Staphylococcus_aureus_4	Klebsiella_Oxytoca	Negative	Negative	Bacterial infection	Training Cohort	Negative	NA	NA	No history of smoking
20211028MCX021	ZY2804	20211028	Pseudomonas_aeruginosa_109,864	Pseudomonas_aeruginosa_20,645	Pseudomonas_aeruginosa	Negative	Negative	Bacterial infection	Training Cohort	Negative	NA	NA	No history of smoking
20220127MCX014	ZY4134	20220127	Pseudomonas_aeruginosa_130,923	Pseudomonas_aeruginosa_33,317	Pseudomonas_aeruginosa	Negative	Negative	Bacterial infection	Validation Cohort	Negative	NA	NA	Unknown
20210716MCX016	ZY1394	20210716	Mycobacterium_abscessus_341，Pseudomonas_aeruginosa_10971	Mycobacterium_abscessus_10, Pseudomonas_aeruginosa_2143	Pseudomonas_aeruginosa	Negative	Negative	Bacterial infection	Training Cohort	Negative	NA	NA	No history of smoking
20210820MCX013	ZY1868	20210820	Pseudomonas_aeruginosa_100,476	Pseudomonas_aeruginosa_18,091	Pseudomonas_aeruginosa	Negative	Negative	Bacterial infection	Training Cohort	Negative	NA	NA	No history of smoking
20220112MCX014	ZY3896	20220112	Pseudomonas_aeruginosa_104,968	Pseudomonas_aeruginosa_45,133	Pseudomonas_aeruginosa	Negative	Negative	Bacterial infection	Validation Cohort	Negative	NA	NA	No history of smoking
20211015MCX011	ZY2597	20211015	Pseudomonas_aeruginosa_38,270	Pseudomonas_aeruginosa_2,769	Negative	Negative	Negative	Bacterial infection	Training Cohort	Negative	NA	NA	No history of smoking
20210419MCX007	ZY469	20210419	Acinetobacter_baumannii_51647	Acinetobacter_baumannii_4218	Acinetobacter_baumannii	Negative	Negative	Bacterial infection	Training Cohort	Negative	NA	NA	No history of smoking
20210807MCX013	ZY1674	20210807	Staphylococcus_aureus_18,679	Negative	Negative	Negative	Negative	Bacterial infection	Training Cohort	Negative	NA	NA	No history of smoking
20210909MCX011	ZY2145	20210909	Pneumocystis_jirovecii_15,570	Pneumocystis_jirovecii_57,295	Negative	Negative	Negative	Fungal infection	Training Cohort	Negative	NA	NA	No history of smoking
230609MCX00025	ZY15387	20230609	Aspergillus_flavus_9	Negative	Negative	Negative	Negative	Fungal infection	Validation Cohort	Negative	NA	NA	No history of smoking
20210330MCX006	ZY282	20210330	Cryptococcus_neoformans_173	Negative	Cryptococcus_neoformans	Negative	Negative	Fungal infection	Training Cohort	Negative	NA	NA	No history of smoking
20210612MCX012	ZY1025	20210612	Pneumocystis_jirovecii_5	Negative	Negative	Negative	Negative	Fungal infection	Training Cohort	Negative	NA	NA	No history of smoking
20210719MCX005	ZY1412	20210719	Cryptococcus_neoformans_8	Negative	Negative	Negative	Negative	Fungal infection	Training Cohort	Negative	NA	NA	No history of smoking
20210401MCX008	ZY301	20210401	Cryptococcus_neoformans_2	Negative	Negative	Negative	Negative	Fungal infection	Training Cohort	Negative	NA	NA	History of smoking
20211119MCX007	ZY3140	20211119	Pneumocystis_jirovecii_184	Pneumocystis_jirovecii_4,396	Negative	Negative	Negative	Fungal infection	Training Cohort	Negative	NA	NA	No history of smoking
20210716MCX019	ZY1397	20210716	Aspergillus_fumigatus_11	EBV_26	Negative	Negative	Negative	Fungal infection	Training Cohort	Negative	NA	NA	No history of smoking
20210710MCX007	ZY1329	20210710	Talaromyces_marneffei_853052	Talaromyces_marneffei_29116	Talaromyces_marneffei	Negative	Negative	Fungal infection	Training Cohort	Negative	NA	NA	History of smoking
20210619MCX013	ZY1086	20210619	Cryptococcus_neoformans_133	Negative	Negative	Negative	Negative	Fungal infection	Training Cohort	Negative	NA	NA	History of smoking
20210601MCX013	ZY876	20210601	Pneumocystis_jirovecii_3466	CMV_154, Pneumocystis_jirovecii_27900	Negative	Negative	Negative	Fungal infection	Training Cohort	Negative	NA	NA	History of smoking
20211221MCX010	ZY3572	20211221	Cryptococcus_neoformans_119	Negative	Negative	Negative	Negative	Fungal infection	Training Cohort	Negative	NA	NA	History of smoking
230421MCX00020	ZY13952	20230421	Aspergillus_fumigatus_1,659	Negative	Negative	Negative	Negative	Fungal infection	Validation Cohort	Negative	NA	NA	History of smoking
230527MCX00019	ZY14993	20230527	Candida_albicans_16,297, Aspergillus_flavus_3	Negative	Negative	Negative	Negative	Fungal infection	Validation Cohort	Negative	NA	NA	History of smoking
20210915MCX007	ZY2230	20210915	Pneumocystis_jirovecii_1	Pneumocystis_jirovecii_64	Negative	Negative	Negative	Fungal infection	Training Cohort	Negative	NA	NA	History of smoking
20210617MCX008	ZY1058	20210617	Pneumocystis_jirovecii_200027	Pneumocystis_jirovecii_1438591	Negative	Negative	Negative	Fungal infection	Training Cohort	Negative	NA	NA	No history of smoking
20210625MCX010	ZY1152	20210625	Tropheryma_whipplei_4,123	Negative	Negative	Negative	Negative	Fungal infection	Training Cohort	Negative	NA	NA	No history of smoking
20210707MCX011	ZY1291	20210707	Cryptococcus_neoformans_，110	Negative	Cryptococcus_neoformans	Negative	Negative	Fungal infection	Training Cohort	Negative	NA	NA	History of smoking
230610MCX00018	ZY15417	20230610	Aspergillus_fumigatus_7	Negative	Negative	Negative	Negative	Fungal infection	Validation Cohort	Negative	NA	NA	No history of smoking
20211117MCX012	ZY3106	20211117	Scedosporium_apiospermum_179	Scedosporium_apiospermum_1	Scedosporium_apiospermum	Negative	Negative	Fungal infection	Training Cohort	Negative	NA	NA	History of smoking
20210901MCX015	ZY2019	20210901	Penicillium_steckii 2	Negative	Penicillium	Negative	Negative	Fungal infection	Training Cohort	Negative	NA	NA	No history of smoking
230524MCX00019	ZY14886	20230524	Aspergillus_fumigatus_689	Negative	Negative	Negative	Negative	Fungal infection	Validation Cohort	Negative	NA	NA	No history of smoking
20210420MCX005	ZY475	20210420	Aspergillus_fumigatus_2	Negative	Negative	Negative	Negative	Fungal infection	Training Cohort	Negative	NA	NA	History of smoking
20210902MCX005	ZY2027	20210902	Cryptococcus_neoformans_715	Negative	Negative	Negative	Negative	Fungal infection	Training Cohort	Negative	NA	NA	History of smoking
20210604MCX018	ZY939	20210604	Morococcus_cerebrosus724, Aspergillus_flavus_7, EBV_4	CMV_17，EBV_5	Negative	Negative	Negative	Fungal infection	Training Cohort	Negative	NA	NA	No history of smoking
20211115MCX003	ZY3056	20211115	Candida_albicans_370	Negative	Negative	Negative	Negative	Fungal infection	Training Cohort	Negative	NA	NA	No history of smoking
20210413MCX011	ZY411	20210413	Pneumocystis_jirovecii_13	Pneumocystis_jirovecii_55	Negative	Negative	Negative	Fungal infection	Training Cohort	Negative	NA	NA	History of smoking
20210419MCX006	ZY468	20210419	Pneumocystis_jirovecii_403	Pneumocystis_jirovecii_220	Negative	Negative	Negative	Fungal infection	Training Cohort	Negative	NA	NA	History of smoking
20220215MCX018	ZY4370	20220215	Cryptococcus_neoformans_870	Cryptococcus_neoformans_10	Negative	Negative	Negative	Fungal infection	Training Cohort	Negative	NA	NA	History of smoking
230414MCX00014	ZY13737	20230414	Aspergillus_fumigatus_48 Rhizopus_delemar_3	Negative	Negative	Negative	Negative	Fungal infection	Validation Cohort	Negative	NA	NA	No history of smoking
20210923MCX014	ZY2319	20210923	Aspergillus_fumigatus_3	Negative	Negative	Negative	Negative	Fungal infection	Training Cohort	Negative	NA	NA	No history of smoking
20210409MCX016	ZY374	20210409	Aspergillus_fumigatus_8	Negative	Negative	Negative	Negative	Fungal infection	Training Cohort	Negative	NA	NA	No history of smoking
20210514MCX011	ZY691	20210514	Pneumocystis_jirovecii_223	Pneumocystis_jirovecii_5690	Negative	Negative	Negative	Fungal infection	Training Cohort	Negative	NA	NA	No history of smoking
20211208MCX015	ZY3401	20211208	Aspergillus_niger_15	Negative	Negative	Negative	Negative	Fungal infection	Training Cohort	Negative	NA	NA	No history of smoking
20210603MCX009	ZY908	20210603	Cryptococcus_neoformans_4	Negative	Candida glabrata	Negative	Negative	Fungal infection	Training Cohort	Negative	NA	NA	History of smoking
20211217MCX014	ZY3531	20211217	Aspergillus_flavus_5	Negative	Aspergillus_flavus	Negative	Negative	Fungal infection	Training Cohort	Negative	NA	NA	History of smoking
20220125MCX016	ZY4100	20220125	Aspergillus_fumigatus_12	Negative	Negative	Negative	Negative	Fungal infection	Training Cohort	Negative	NA	NA	History of smoking
20220215MCX021	ZY4373	20220215	Pneumocystis_jirovecii_17,222	Pneumocystis_jirovecii_118,260	Candida_albicans	Negative	Negative	Fungal infection	Training Cohort	Negative	NA	NA	History of smoking
20211130MCX014	ZY3291	20211130	Pneumocystis_jirovecii_92, Aspergillus_niger_9	Pneumocystis_jirovecii_18	Negative	Negative	Negative	Fungal infection	Training Cohort	Negative	NA	NA	History of smoking
20220226MCX022	ZY4553	20220226	Pneumocystis_jirovecii_3	Pneumocystis_jirovecii_21	Negative	Negative	Negative	Fungal infection	Training Cohort	Negative	NA	NA	History of smoking
20220308MCX017	ZY4691	20220308	Talaromyces_marneffei_5,076	Negative	Talaromyces_marneffei	Negative	Negative	Fungal infection	Validation Cohort	Negative	NA	NA	History of smoking
230421MCX00028	ZY13960	20230421	Aspergillus_fumigatus_2	Negative	Negative	Negative	Negative	Fungal infection	Validation Cohort	Negative	NA	NA	History of smoking
20210924MCX011	ZY2339	20210924	Cryptococcus_neoformans_5	Negative	Negative	Negative	Negative	Fungal infection	Training Cohort	Negative	NA	NA	History of smoking
20220218MCX014	ZY4431	20220218	Pneumocystis_jirovecii_85, 4Cryptococcus_neoformans_1,125	Pneumocystis_jirovecii_28, Cryptococcus_neoformans_5	Cryptococcus_neoformans	Negative	Negative	Fungal infection	Training Cohort	Negative	NA	NA	History of smoking
230516MCX00036	ZY14679	20230516	Aspergillus_fumigatus_956	Negative	Negative	Negative	Negative	Fungal infection	Validation Cohort	Negative	NA	NA	No history of smoking
20220304MCX013	ZY4646	20220304	Negative	Negative	Aspergillus_fumigatus	Negative	Negative	Fungal infection	Validation Cohort	Negative	NA	NA	History of smoking
230406MCX00012	ZY13504	20230406	Aspergillus_niger_12	Negative	Negative	Negative	Negative	Fungal infection	Validation Cohort	Negative	NA	NA	History of smoking
230616MCX00017	ZY15574	20230616	Aspergillus_fumigatus_20	Negative	Negative	Negative	Negative	Fungal infection	Validation Cohort	Negative	NA	NA	No history of smoking
20210731MCX011	ZY1587	20210731	Nectria_haematococca32	Negative	Fusarium_Solani	Negative	Negative	Fungal infection	Training Cohort	Negative	NA	NA	No history of smoking
20210907MCX019	ZY2105	20210907	Candida_tropicalis_12,246	Candida_tropicalis_25	Negative	Negative	Negative	Fungal infection	Training Cohort	Negative	NA	NA	History of smoking
20220114MCX015	ZY3938	20220114	Schizophyllum_commune_220	Negative	Schizophyllum_commune	Negative	Negative	Fungal infection	Training Cohort	Negative	NA	NA	No history of smoking
230614MCX00013	ZY15502	20230614	Pneumocystis_jirovecii_23, Aspergillus_fumigatus_4	Pneumocystis_jirovecii_355	Negative	Negative	Negative	Fungal infection	Validation Cohort	Negative	NA	NA	History of smoking
230524MCX00017	ZY14884	20230524	Aspergillus_fumigatus_1,393	Negative	Negative	Negative	Negative	Fungal infection	Validation Cohort	Negative	NA	NA	No history of smoking
20210428MCX012	ZY562	20210428	Pneumocystis_jirovecii_2	Pneumocystis_jirovecii_55	Negative	Negative	Negative	Fungal infection	Training Cohort	Negative	NA	NA	History of smoking
230610MCX00012	ZY15411	20230610	Aspergillus_fumigatus_9	Negative	Negative	Negative	Negative	Fungal infection	Validation Cohort	Negative	NA	NA	History of smoking
20210810MCX013	ZY1711	20210810	Candida_tropicalis_233,006, Aspergillus_flavus_75, Aspergillus_fumigatus_70, Cryptococcus_neoformans_24, CMV 2	Candida_tropicalis_189	Aspergillus_flavus	Negative	Negative	Fungal infection	Training Cohort	Negative	NA	NA	No history of smoking
20220112MCX017	ZY3899	20220112	Aspergillus_fumigatus_998	Negative	Aspergillus_fumigatus	Negative	Negative	Fungal infection	Training Cohort	Negative	NA	NA	No history of smoking
230621MCX00018	ZY15693	20230621	Aspergillus_fumigatus_2	Negative	Negative	Negative	Negative	Fungal infection	Validation Cohort	Negative	NA	NA	No history of smoking
20210601MCX009	ZY872	20210601	Aspergillus_oryzae_8	Negative	Negative	Negative	Negative	Fungal infection	Training Cohort	Negative	NA	NA	History of smoking
20210709MCX011	ZY1318	20210709	Aspergillus_fumigatus_1	Negative	Negative	Negative	Negative	Fungal infection	Training Cohort	Negative	NA	NA	History of smoking
20220118MCX016	ZY3999	20220118	Cryptococcus_neoformans_59	Negative	Negative	Negative	Negative	Fungal infection	Training Cohort	Negative	NA	NA	History of smoking
230401MCX00022	ZY13380	20230401	Aspergillus_fumigatus_33, Pneumocystis_jirovecii_9	Pneumocystis_jirovecii_1	Negative	Negative	Negative	Fungal infection	Validation Cohort	Negative	NA	NA	History of smoking
20210904MCX008	ZY2057	20210904	Aspergillus_flavus_117	Negative	Negative	Negative	Negative	Fungal infection	Training Cohort	Negative	NA	NA	No history of smoking
20220115MCX010	ZY3958	20220115	Negative	Pneumocystis_jirovecii_12	Negative	Negative	Negative	Fungal infection	Training Cohort	Negative	NA	NA	History of smoking
230523MCX00019	ZY14857	20230523	Aspergillus_flavus_1,089	Negative	Negative	Negative	Negative	Fungal infection	Validation Cohort	Negative	NA	NA	No history of smoking
230613MCX00010	ZY15462	20230613	Aspergillus_flavus_9	Negative	Negative	Negative	Negative	Fungal infection	Validation Cohort	Negative	NA	NA	No history of smoking
20211217MCX015	ZY3532	20211217	Aspergillus_steynii 7	Negative	Penicillium	Negative	Negative	Fungal infection	Training Cohort	Negative	NA	NA	No history of smoking
20220212MCX010	ZY4331	20220212	Pneumocystis_jirovecii_160	Pneumocystis_jirovecii_6,525	Negative	Negative	Negative	Fungal infection	Training Cohort	Negative	NA	NA	History of smoking
230516MCX00019	ZY14662	20230516	Aspergillus_fumigatus_464	Negative	Negative	Negative	Negative	Fungal infection	Validation Cohort	Negative	NA	NA	History of smoking
230603MCX00017	ZY15217	20230603	Aspergillus_fumigatus_28	Negative	Negative	Negative	Negative	Fungal infection	Validation Cohort	Negative	NA	NA	History of smoking
20210410MCX005	ZY384	20210410	Pneumocystis_jirovecii_1530	Pneumocystis_jirovecii_16791	Negative	Negative	Negative	Fungal infection	Training Cohort	Negative	NA	NA	No history of smoking
20210713MCX012	ZY1357	20210713	Aspergillus_fumigatus_23	Negative	Aspergillus_fumigatus	Negative	Negative	Fungal infection	Training Cohort	Negative	NA	NA	No history of smoking
230419MCX00028	ZY13874	20230419	Aspergillus_fumigatus_1 Rhizopus_oligosporus_2	Negative	Negative	Negative	Negative	Fungal infection	Validation Cohort	Negative	NA	NA	Unknown
20210312MCX003	ZY143	20210312	Aspergillus_fumigatus_，287	Pneumocystis_jirovecii_51	Candida_albicans	Negative	Negative	Fungal infection	Training Cohort	Negative	NA	NA	No history of smoking
20210810MCX012	ZY1710	20210810	Candida_albicans_708, Pneumocystis_jirovecii_13	Pneumocystis_jirovecii_109	Negative	Negative	Negative	Fungal infection	Training Cohort	Negative	NA	NA	Unknown
20211112MCX014	ZY3019	20211112	Stenotrophomonas_maltophilia_6,876, Scedosporium_apiospermum_3	Negative	Negative	Negative	Negative	Fungal infection	Training Cohort	Negative	NA	NA	No history of smoking
20210706MCX012	ZY1275	20210706	Pneumocystis_jirovecii_3，Aspergillus_fumigatus_，1	Pneumocystis_jirovecii_46	Negative	Negative	Negative	Fungal infection	Training Cohort	Negative	NA	NA	Unknown
230620MCX00025	ZY15666	20230620	Aspergillus_flavus_19	Negative	Negative	Negative	Negative	Fungal infection	Validation Cohort	Negative	NA	NA	No history of smoking
20220104MCX011	ZY3766	20220104	Candida_tropicalis_826, Candida glabrata_803, Candida_albicans_762	Candida_tropicalis_66, Candida_albicans_25, Candida glabrata_8	Candida_tropicalis, Candida glabrata	Negative	Negative	Fungal infection	Training Cohort	Negative	NA	NA	No history of smoking
20210326MCX005	ZY257	20210326	Negative	Negative	Negative	Negative	Negative	Lung cancer	Training Cohort	Squamous cell carcinoma	I	KRAS	No history of smoking
20210330MCX005	ZY281	20210330	Negative	Negative	Negative	Negative	Negative	Lung cancer	Training Cohort	Adenocarcarcinoma	I	EGFR	History of smoking
20210910MCX010	ZY2161	20210910	Negative	Negative	Negative	Negative	Negative	Lung cancer	Training Cohort	Adenocarcarcinoma	I	EGFR	History of smoking
20211029MCX014	ZY2825	20211029	Negative	Negative	Negative	Negative	Negative	Lung cancer	Validation Cohort	Adenocarcarcinoma	IV	ALK	History of smoking
20210910MCX011	ZY2162	20210910	Negative	Negative	Negative	Negative	Negative	Lung cancer	Training Cohort	Adenocarcarcinoma	I	RET	History of smoking
20210910MCX007	ZY2158	20210910	Negative	Negative	Negative	Negative	Negative	Lung cancer	Training Cohort	Adenocarcarcinoma	I	EGFR	History of smoking
20210730MCX009	ZY1565	20210730	Negative	Negative	Negative	Negative	Negative	Lung cancer	Training Cohort	Adenocarcarcinoma	I	EGFR	No history of smoking
20220113MCX017	ZY3920	20220113	Negative	Negative	Negative	Negative	Negative	Lung cancer	Validation Cohort	Adenocarcarcinoma	IV	KRAS	No history of smoking
20211209MCX019	ZY3425	20211209	Negative	Negative	Negative	Negative	Negative	Lung cancer	Validation Cohort	Adenocarcarcinoma	III	ALK	No history of smoking
20211127MCX010	ZY3257	20211127	Negative	Negative	Negative	Negative	Negative	Lung cancer	Validation Cohort	Adenocarcarcinoma	II	EGFR	History of smoking
20210618MCX008	ZY1070	20210618	Negative	Negative	Negative	Negative	Negative	Lung cancer	Training Cohort	Adenocarcarcinoma	I	EGFR	No history of smoking
20211218MCX011	ZY3545	20211218	Negative	Negative	Negative	Negative	Negative	Lung cancer	Validation Cohort	Squamous cell carcinoma	IV	EGFR	History of smoking
20210524MCX007	ZY785	20210524	Negative	Negative	Negative	Negative	Negative	Lung cancer	Training Cohort	Adenocarcarcinoma	IV	EGFR	No history of smoking
20210802MCX012	ZY1606	20210802	Negative	Negative	Negative	Negative	Negative	Lung cancer	Training Cohort	Adenocarcarcinoma	I	EGFR	No history of smoking
20210827MCX009	ZY1961	20210827	Negative	Negative	Negative	Negative	Negative	Lung cancer	Training Cohort	SCLC	III	-	History of smoking
20210914MCX010	ZY2217	20210914	Negative	Negative	Negative	Negative	Negative	Lung cancer	Training Cohort	Squamous cell carcinoma	III	EGFR	No history of smoking
20210714MCX008	ZY1368	20210714	Negative	Negative	Negative	Negative	Negative	Lung cancer	Training Cohort	Adenocarcarcinoma	I	EGFR	No history of smoking
20211113MCX008	ZY3035	20211113	Negative	Negative	Negative	Negative	Negative	Lung cancer	Validation Cohort	Adenocarcarcinoma	IV	EGFR	No history of smoking
20211020MCX013	ZY2673	20211020	Negative	Negative	Negative	Negative	Negative	Lung cancer	Training Cohort	Squamous cell carcinoma	I	EGFR	No history of smoking
20210928MCX009	ZY2380	20210928	Tropheryma_whipplei_699	Negative	Negative	Negative	Negative	Lung cancer	Training Cohort	Adenocarcarcinoma	I	EGFR	History of smoking
20210819MCX009	ZY1846	20210819	Negative	Negative	Negative	Negative	Negative	Lung cancer	Training Cohort	Squamous cell carcinoma	IV	EGFR	History of smoking
20210330MCX002	ZY278	20210330	Negative	Negative	Negative	Negative	Negative	Lung cancer	Training Cohort	Squamous cell carcinoma	IV	EGFR	History of smoking
20220115MCX016	ZY3964	20220115	Negative	Negative	Negative	Negative	Negative	Lung cancer	Validation Cohort	Adenocarcarcinoma	IV	EGFR	Unknown
20211125MCX012	ZY3227	20211125	Negative	Negative	Negative	Negative	Negative	Lung cancer	Validation Cohort	Adenocarcarcinoma	III	ROS1	History of smoking
20210507MCX008	ZY629	20210507	Negative	Negative	Negative	Negative	Negative	Lung cancer	Training Cohort	Adenocarcarcinoma	I	EGFR	No history of smoking
20210526MCX014	ZY812	20210526	Negative	Negative	Negative	Negative	Negative	Lung cancer	Training Cohort	Adenocarcarcinoma	I	EGFR	No history of smoking
20210623MCX012	ZY1122	20210623	Negative	Negative	Negative	Negative	Negative	Lung cancer	Training Cohort	Adenocarcarcinoma	I	EGFR	No history of smoking
20211004MCX018	ZY2427	20211004	Negative	Negative	Negative	Negative	Negative	Lung cancer	Training Cohort	SCLC	III	-	No history of smoking
20210618MCX007	ZY1069	20210618	Negative	EBV_7	Negative	Negative	Negative	Lung cancer	Training Cohort	Squamous cell carcinoma	II	EGFR	History of smoking
20210909MCX012	ZY2146	20210909	Negative	Negative	Negative	Negative	Negative	Lung cancer	Training Cohort	Adenocarcarcinoma	I	KRAS	History of smoking
20210330MCX004	ZY280	20210330	EBV_1	EBV_1	Negative	Negative	Negative	Lung cancer	Training Cohort	Adenocarcarcinoma	I	EGFR	History of smoking
20210619MCX010	ZY1083	20210619	Negative	Negative	Negative	Negative	Negative	Lung cancer	Training Cohort	Adenocarcarcinoma	I	EGFR	No history of smoking
20211222MCX007	ZY3584	20211222	Negative	Negative	Negative	Negative	Negative	Lung cancer	Validation Cohort	Squamous cell carcinoma	IV	EGFR	Unknown
20211229MCX016	ZY3695	20211229	Negative	Negative	Negative	Negative	Negative	Lung cancer	Validation Cohort	Adenocarcarcinoma	IV	KRAS	History of smoking
20220219MCX016	ZY4451	20220219	Pneumocystis_jirovecii_15	Pneumocystis_jirovecii_124	Negative	Negative	Negative	Lung cancer	Validation Cohort	Adenocarcarcinoma	III	KRAS	History of smoking
20211029MCX010	ZY2821	20211029	Negative	Negative	Negative	Negative	Negative	Lung cancer	Validation Cohort	Squamous cell carcinoma	I	KRAS	History of smoking
20211117MCX010	ZY3104	20211117	Negative	Negative	Negative	Negative	Negative	Lung cancer	Validation Cohort	Squamous cell carcinoma	II	KRAS	No history of smoking
20220217MCX012	ZY4406	20220217	Cryptococcus_neoformans_45	Negative	Negative	Negative	Negative	Lung cancer	Validation Cohort	Adenocarcarcinoma	I	KRAS	No history of smoking
20210618MCX005	ZY1067	20210618	Negative	Negative	Negative	Negative	Negative	Lung cancer	Training Cohort	Adenocarcarcinoma	I	EGFR	No history of smoking
20210630MCX015	ZY1208	20210630	Negative	Negative	Negative	Negative	Negative	Lung cancer	Training Cohort	Adenocarcarcinoma	I	EGFR	No history of smoking
20210730MCX017	ZY1573	20210730	Negative	Negative	Negative	Negative	Negative	Lung cancer	Training Cohort	Squamous cell carcinoma	I	KRAS	No history of smoking
20211106MCX007	ZY2938	20211106	Negative	Negative	Negative	Negative	Negative	Lung cancer	Validation Cohort	Squamous cell carcinoma	IV	EGFR	History of smoking
20210712MCX011	ZY1343	20210712	Negative	Negative	Negative	Negative	Negative	Lung cancer	Training Cohort	Adenocarcarcinoma	I	EGFR	No history of smoking
20210928MCX006	ZY2377	20210928	Negative	Negative	Negative	Negative	Negative	Lung cancer	Training Cohort	Squamous cell carcinoma	II	EGFR	History of smoking
20210812MCX008	ZY1743	20210812	EBV_433	EBV_1	Negative	Negative	Negative	Lung cancer	Training Cohort	Adenocarcarcinoma	I	KRAS	History of smoking
20210728MCX012	ZY1537	20210728	CMV_23	Negative	Negative	Negative	Negative	Lung cancer	Training Cohort	Squamous cell carcinoma	IV	MET	Unknown
20210922MCX011	ZY2300	20210922	Negative	Negative	Negative	Negative	Negative	Lung cancer	Training Cohort	Adenocarcarcinoma	I	EGFR	History of smoking
20210731MCX007	ZY1583	20210731	Negative	Negative	Negative	Negative	Negative	Lung cancer	Training Cohort	Mucinous adenocarcinoma	III	KRAS	History of smoking
20210827MCX014	ZY1966	20210827	Negative	Negative	Negative	Negative	Negative	Lung cancer	Training Cohort	Adenocarcarcinoma	I	ROS1	History of smoking
20211019MCX016	ZY2651	20211019	Negative	Negative	Negative	Negative	Negative	Lung cancer	Training Cohort	Adenocarcarcinoma	II	EGFR	Unknown
20210807MCX014	ZY1675	20210807	Negative	Negative	Negative	Negative	Negative	Lung cancer	Training Cohort	Adenocarcarcinoma	I	KRAS	History of smoking
20220112MCX016	ZY3898	20220112	Negative	Negative	Negative	Negative	Negative	Lung cancer	Validation Cohort	Adenocarcarcinoma	I	KRAS	History of smoking
20210429MCX009	ZY573	20210429	Negative	Negative	Negative	Negative	Negative	Lung cancer	Training Cohort	Adenocarcarcinoma	IV	EGFR	No history of smoking
20210816MCX011	ZY1801	20210816	Negative	Negative	Negative	Negative	Negative	Lung cancer	Training Cohort	Adenocarcarcinoma	I	ALK	History of smoking
20211126MCX011	ZY3243	20211126	Negative	Negative	Negative	Negative	Negative	Lung cancer	Validation Cohort	Squamous cell carcinoma	III	ALK	History of smoking
20210323MCX007	ZY229	20210323	Negative	Negative	Negative	Negative	Negative	Lung cancer	Training Cohort	Squamous cell carcinoma	I	EGFR	History of smoking
20211016MCX015	ZY2619	20211016	Negative	Negative	Negative	Negative	Negative	Lung cancer	Training Cohort	Squamous cell carcinoma	II	EGFR	History of smoking
20211028MCX015	ZY2798	20211028	Negative	Negative	Negative	Negative	Negative	Lung cancer	Validation Cohort	Squamous cell carcinoma	IV	EGFR	History of smoking
20210329MCX004	ZY275	20210329	Negative	CMV_5	Negative	Negative	Negative	Lung cancer	Training Cohort	Squamous cell carcinoma	I	KRAS	History of smoking
20210325MCX003	ZY247	20210325	EBV_44	Negative	Negative	Negative	Negative	Lung cancer	Training Cohort	Squamous cell carcinoma	I	EGFR	No history of smoking
20210910MCX012	ZY2163	20210910	Negative	Negative	Negative	Negative	Negative	Lung cancer	Training Cohort	SCLC	III	-	History of smoking
20210430MCX009	ZY585	20210430	Negative	Negative	Negative	Negative	Negative	Lung cancer	Training Cohort	Adenocarcarcinoma	I	EGFR	History of smoking
20210604MCX011	ZY932	20210604	Negative	Negative	Negative	Negative	Negative	Lung cancer	Training Cohort	Adenocarcarcinoma	III	EGFR	History of smoking
20210910MCX019	ZY2170	20210910	EBV_22	EBV_6	Negative	Negative	Negative	Lung cancer	Training Cohort	Adenocarcarcinoma	IV	EGFR	No history of smoking
20210907MCX017	ZY2103	20210907	Negative	Negative	Negative	Negative	Negative	Lung cancer	Training Cohort	Squamous cell carcinoma	III	EGFR	No history of smoking
20211011MCX008	ZY2521	20211011	EBV_4	EBV_6	Negative	Negative	Negative	Lung cancer	Training Cohort	Squamous cell carcinoma	IV	EGFR	No history of smoking
20211230MCX010	ZY3709	20211230	Negative	Negative	Negative	Negative	Negative	Lung cancer	Validation Cohort	Adenocarcarcinoma	IV	KRAS	History of smoking
20211016MCX013	ZY2617	20211016	Negative	Negative	Negative	Negative	Negative	Lung cancer	Training Cohort	Squamous cell carcinoma	I	KRAS	Unknown
20211231MCX012	ZY3728	20211231	Negative	Negative	Negative	Negative	Negative	Lung cancer	Validation Cohort	Adenocarcarcinoma	I	EGFR	No history of smoking
20220127MCX024	ZY4142	20220127	Negative	Negative	Negative	Negative	Negative	Lung cancer	Validation Cohort	SCLC	IV	-	History of smoking
20211006MCX010	ZY2458	20211006	Negative	Negative	Negative	Negative	Negative	Lung cancer	Training Cohort	Squamous cell carcinoma	IV	BRAF	History of smoking
20210528MCX007	ZY840	20210528	Negative	Negative	Negative	Negative	Negative	Lung cancer	Training Cohort	Adenocarcarcinoma	I	EGFR	History of smoking
20210910MCX015	ZY2166	20210910	Negative	Negative	Negative	Negative	Negative	Lung cancer	Training Cohort	Adenocarcarcinoma	II	EGFR	History of smoking
20210703MCX008	ZY1242	20210703	CMV_34	CMV_3	Negative	Negative	Negative	Lung cancer	Training Cohort	Squamous cell carcinoma	I	EGFR	History of smoking
20210907MCX013	ZY2099	20210907	Negative	Negative	Negative	Negative	Negative	Lung cancer	Training Cohort	Adenocarcarcinoma	I	KRAS	History of smoking
20210804MCX003	ZY1622	20210804	Negative	Negative	Negative	Negative	Negative	Lung cancer	Training Cohort	Adenocarcarcinoma	I	EGFR	No history of smoking
20220115MCX009	ZY3957	20220115	Negative	Negative	Negative	Negative	Negative	Lung cancer	Validation Cohort	Adenocarcarcinoma	IV	EGFR	No history of smoking
20210723MCX015	ZY1471	20210723	Candida_albicans_3,393, EBV_101	CMV_43, EBV_V29	Negative	Negative	Negative	Lung cancer	Training Cohort	SCLC	II	-	History of smoking
20211026MCX013	ZY2756	20211026	Negative	Negative	Negative	Negative	Negative	Lung cancer	Training Cohort	SCLC	III	-	History of smoking
20220121MCX009	ZY4050	20220121	Negative	Negative	Negative	Negative	Negative	Lung cancer	Validation Cohort	SCLC	II	-	History of smoking
20211230MCX011	ZY3710	20211230	Negative	Negative	Negative	Negative	Negative	Lung cancer	Validation Cohort	Adenocarcarcinoma	II	EGFR	History of smoking
20220226MCX019	ZY4550	20220226	Pneumocystis_jirovecii_1,582	Pneumocystis_jirovecii_11,810	Negative	Negative	Negative	Lung cancer	Validation Cohort	Adenocarcarcinoma	III	EGFR	History of smoking
20220121MCX008	ZY4049	20220121	Negative	Negative	Negative	Negative	Negative	Lung cancer	Validation Cohort	Squamous cell carcinoma	III	EGFR	History of smoking
20211229MCX015	ZY3694	20211229	Negative	Negative	Negative	Negative	Negative	Lung cancer	Validation Cohort	Adenocarcarcinoma	IV	KRAS	History of smoking
20220105MCX011	ZY3783	20220105	Negative	Negative	Negative	Negative	Negative	Lung cancer	Validation Cohort	Adenocarcarcinoma	III	KRAS	History of smoking
20210702MCX009	ZY1229	20210702	Negative	Negative	Negative	Negative	Negative	Lung cancer	Training Cohort	Adenocarcarcinoma	I	EGFR	No history of smoking
20210915MCX011	ZY2234	20210915	Negative	Negative	Negative	Negative	Negative	Lung cancer	Training Cohort	Adenocarcarcinoma	I	EGFR	No history of smoking
20211210MCX014	ZY3445	20211210	Negative	Negative	Negative	Negative	Negative	Lung cancer	Validation Cohort	Adenocarcarcinoma	I	EGFR	History of smoking
20210309MCX007	ZY116	20210309	Streptococcus_mitis_7575	Negative	Negative	Negative	Negative	Lung cancer	Training Cohort	Squamous cell carcinoma	II	EGFR	History of smoking
20210319MCX011	ZY209	20210319	Negative	Negative	Negative	Negative	Negative	Lung cancer	Training Cohort	Squamous cell carcinoma	I	EGFR	History of smoking
20210710MCX009	ZY1331	20210710	HHV7_3	Negative	Negative	Negative	Negative	Lung cancer	Training Cohort	Squamous cell carcinoma	I	KRAS	No history of smoking
20210410MCX001	ZY380	20210410	EBV_2	Negative	Negative	Negative	Negative	Lung cancer	Training Cohort	Adenocarcarcinoma	I	EGFR	No history of smoking
20211110MCX010	ZY2985	20211110	Negative	Negative	Negative	Negative	Negative	Lung cancer	Validation Cohort	Squamous cell carcinoma	I	BRAF	No history of smoking
20210415MCX002	ZY437	20210415	Negative	Negative	Negative	Negative	Negative	Lung cancer	Training Cohort	Adenocarcarcinoma	IV	EGFR	History of smoking
20210805MCX014	ZY1643	20210805	Mycobacterium_intracellulare_4	Negative	Negative	Negative	Negative	Lung cancer	Training Cohort	Adenocarcarcinoma	I	EGFR	History of smoking
20211022MCX015	ZY2711	20211022	Candida_albicans_357,062	CMV_11	Negative	Negative	Negative	Lung cancer	Training Cohort	Adenocarcarcinoma	I	EGFR	History of smoking
20210730MCX018	ZY1574	20210730	Negative	Negative	Negative	Negative	Negative	Lung cancer	Training Cohort	Adenocarcarcinoma	III	EGFR	No history of smoking
20210826MCX009	ZY1948	20210826	Negative	Negative	Negative	Negative	Negative	Lung cancer	Training Cohort	Adenocarcarcinoma	II	EGFR	No history of smoking
20220122MCX014	ZY4069	20220122	Entercoccus_faecalis_658	Negative	Negative	Negative	Negative	Lung cancer	Validation Cohort	Adenocarcarcinoma	I	KRAS	History of smoking
20220127MCX030	ZY4148	20220127	Negative	Negative	Negative	Negative	Negative	Lung cancer	Validation Cohort	Adenocarcarcinoma	II	KRAS	History of smoking
20210814MCX014	ZY1784	20210814	EBV_3	CMV_16	Negative	Negative	Negative	Lung cancer	Training Cohort	Mucinous adenocarcinoma	IV	KRAS	History of smoking
20210701MCX010	ZY1218	20210701	Pneumocystis_jirovecii_24	Negative	Negative	Negative	Negative	Lung cancer	Training Cohort	Adenocarcarcinoma	IV	EGFR	No history of smoking
20210729MCX011	ZY1549	20210729	Negative	Negative	Negative	Negative	Negative	Lung cancer	Training Cohort	Adenocarcarcinoma	I	EGFR	No history of smoking
20210910MCX013	ZY2164	20210910	Negative	Negative	Negative	Negative	Negative	Lung cancer	Training Cohort	SCLC	III	-	History of smoking
20211109MCX016	ZY2971	20211109	Negative	Negative	Negative	Negative	Negative	Lung cancer	Validation Cohort	Squamous cell carcinoma	II	KRAS	History of smoking
20210906MCX015	ZY2082	20210906	Negative	Negative	Negative	Negative	Negative	Lung cancer	Training Cohort	Adenocarcarcinoma	I	EGFR	History of smoking
20210924MCX016	ZY2344	20210924	Negative	Negative	Negative	Negative	Negative	Lung cancer	Training Cohort	Adenocarcarcinoma	I	EGFR	History of smoking
20211207MCX012	ZY3383	20211207	Negative	Negative	Negative	Negative	Negative	Lung cancer	Validation Cohort	Adenocarcarcinoma	IV	EGFR	History of smoking
20210602MCX013	ZY891	20210602	Entercoccus_faecalis_2,047	Negative	Negative	Negative	Negative	Lung cancer	Training Cohort	SCLC	III	-	History of smoking
20210713MCX013	ZY1358	20210713	Negative	Negative	Negative	Negative	Negative	Lung cancer	Training Cohort	Squamous cell carcinoma	I	EGFR	No history of smoking
20210908MCX019	ZY2132	20210908	Negative	Negative	Negative	Negative	Negative	Lung cancer	Training Cohort	Squamous cell carcinoma	I	EGFR	No history of smoking
20211208MCX010	ZY3396	20211208	Negative	Negative	Negative	Negative	Negative	Lung cancer	Validation Cohort	Adenocarcarcinoma	I	EGFR	History of smoking
20210826MCX011	ZY1950	20210826	Negative	Negative	Negative	Negative	Negative	Lung cancer	Training Cohort	Adenocarcarcinoma	III	EGFR	No history of smoking
20210915MCX010	ZY2233	20210915	Negative	Negative	Negative	Negative	Negative	Lung cancer	Training Cohort	Adenocarcarcinoma	II	ALK	No history of smoking
20210628MCX011	ZY1179	20210628	Negative	Negative	Negative	Negative	Negative	Lung cancer	Training Cohort	Adenocarcarcinoma	I	EGFR	No history of smoking
20210617MCX009	ZY1059	20210617	Candida_albicans_23,888, CMV_3	Candida_albicans_8	Negative	Negative	Negative	Lung cancer	Training Cohort	Adenocarcarcinoma	III	EGFR	History of smoking
20210928MCX012	ZY2383	20210928	Candida_albicans_203, Pneumocystis_jirovecii_7, EBV_15	Candida_albicans_4	Negative	Negative	Negative	Lung cancer	Training Cohort	Adenocarcarcinoma	III	EGFR	History of smoking
20210603MCX006	ZY905	20210603	Negative	Negative	Negative	Negative	Negative	Lung cancer	Training Cohort	Adenocarcarcinoma	II	EGFR	No history of smoking
20210827MCX010	ZY1962	20210827	Negative	Negative	Negative	Negative	Negative	Lung cancer	Training Cohort	Adenocarcarcinoma	II	EGFR	No history of smoking
20211109MCX014	ZY2969	20211109	Negative	Negative	Negative	Negative	Negative	Lung cancer	Validation Cohort	Squamous cell carcinoma	III	EGFR	History of smoking
20210913MCX015	ZY2204	20210913	Negative	Negative	Negative	Negative	Negative	Lung cancer	Training Cohort	Adenocarcarcinoma	I	EGFR	History of smoking
20210603MCX008	ZY907	20210603	CMV_22	Negative	Negative	Negative	Negative	Lung cancer	Training Cohort	Squamous cell carcinoma	II	EGFR	History of smoking
20210716MCX014	ZY1392	20210716	Negative	Negative	Negative	Negative	Negative	Lung cancer	Training Cohort	Squamous cell carcinoma	IV	EGFR	History of smoking
20211203MCX011	ZY3347	20211203	Mycobacterium_tuberculosis_complex_159	Negative	Acid-fast bacilli	++	++	Pulmonary tuberculosis	Training Cohort	Negative	NA	NA	No history of smoking
20211209MCX017	ZY3423	20211209	Mycobacterium_tuberculosis_complex_99	Mycobacterium_tuberculosis_complex_3	Negative	Negative	Negative	Pulmonary tuberculosis	Training Cohort	Negative	NA	NA	No history of smoking
20210517MCX007	ZY710	20210517	Mycobacterium_tuberculosis_complex_72, CMV_2120	Negative	Mycobacterium_tuberculosis	Negative	Negative	Pulmonary tuberculosis	Training Cohort	Negative	NA	NA	No history of smoking
20210923MCX021	ZY2326	20210923	Mycobacterium_tuberculosis_complex_21	Negative	Acid-fast bacilli	+	++	Pulmonary tuberculosis	Training Cohort	Negative	NA	NA	History of smoking
20220310MCX026	ZY4745	20220310	Mycobacterium_tuberculosis_complex_968	Negative	Acid-fast bacilli	++	++	Pulmonary tuberculosis	Validation Cohort	Negative	NA	NA	No history of smoking
20210910MCX014	ZY2165	20210910	Mycobacterium_tuberculosis_complex_24	Negative	Mycobacterium_tuberculosis	+	++	Pulmonary tuberculosis	Training Cohort	Negative	NA	NA	History of smoking
20220226MCX020	ZY4551	20220226	Mycobacterium_tuberculosis_complex_24	Negative	Negative	+	++	Pulmonary tuberculosis	Validation Cohort	Negative	NA	NA	History of smoking
230517MCX00018	ZY14702	20230517	Mycobacterium_tuberculosis_complex_7,540	Mycobacterium_tuberculosis_complex_90	Negative	Negative	Negative	Pulmonary tuberculosis	Validation Cohort	Negative	NA	NA	No history of smoking
20210414MCX013	ZY429	20210414	Mycobacterium_tuberculosis_complex_173	Negative	Acid-fast bacilli	++	++	Pulmonary tuberculosis	Training Cohort	Negative	NA	NA	No history of smoking
230603MCX00015	ZY15215	20230603	Mycobacterium_tuberculosis_complex_123	Negative	Negative	Negative	Negative	Pulmonary tuberculosis	Validation Cohort	Negative	NA	NA	History of smoking
20210923MCX015	ZY2320	20210923	Mycobacterium_tuberculosis_complex_101	Negative	Mycobacterium_tuberculosis	+	++	Pulmonary tuberculosis	Training Cohort	Negative	NA	NA	No history of smoking
230510MCX00019	ZY14509	20230510	Mycobacterium_tuberculosis_complex_69	Negative	Negative	Negative	Negative	Pulmonary tuberculosis	Validation Cohort	Negative	NA	NA	No history of smoking
20220106MCX009	ZY3795	20220106	Mycobacterium_tuberculosis_complex_1,162	Negative	Negative	Negative	++	Pulmonary tuberculosis	Validation Cohort	Negative	NA	NA	History of smoking
20210525MCX011	ZY796	20210525	Mycobacterium_tuberculosis_complex_7,128	Negative	Acid-fast bacilli	++	++	Pulmonary tuberculosis	Training Cohort	Negative	NA	NA	No history of smoking
20210923MCX016	ZY2321	20210923	Negative	Negative	Negative	genexpert	TSPOT	Pulmonary tuberculosis	Training Cohort	Negative	NA	NA	History of smoking
20211222MCX010	ZY3587	20211222	Mycobacterium_tuberculosis_complex_7	Negative	Negative	Negative	++	Pulmonary tuberculosis	Validation Cohort	Negative	NA	NA	History of smoking
20210507MCX009	ZY630	20210507	Mycobacterium_tuberculosis_complex_1	Negative	Negative	+	++	Pulmonary tuberculosis	Training Cohort	Negative	NA	NA	No history of smoking
20210517MCX004	ZY707	20210517	Mycobacterium_tuberculosis_complex_8	Negative	Negative	+	++	Pulmonary tuberculosis	Training Cohort	Negative	NA	NA	History of smoking
230510MCX00020	ZY14510	20230510	Mycobacterium_tuberculosis_complex_3	Negative	Negative	Negative	Negative	Pulmonary tuberculosis	Validation Cohort	Negative	NA	NA	No history of smoking
20210924MCX010	ZY2338	20210924	Mycobacterium_tuberculosis_complex_1	Negative	Negative	+	++	Pulmonary tuberculosis	Training Cohort	Negative	NA	NA	History of smoking
20211120MCX005	ZY3158	20211120	Mycobacterium_tuberculosis_complex_6	Negative	Acid-fast bacilli	+	++	Pulmonary tuberculosis	Training Cohort	Negative	NA	NA	History of smoking
220625MCX00023	ZY6727	20220625	Mycobacterium_tuberculosis_complex_3	Negative	Negative	+	Negative	Pulmonary tuberculosis	Validation Cohort	Negative	NA	NA	History of smoking
20210428MCX011	ZY561	20210428	Mycobacterium_tuberculosis_complex_250	Negative	Acid-fast bacilli	++	++	Pulmonary tuberculosis	Training Cohort	Negative	NA	NA	No history of smoking
20210916MCX005	ZY2244	20210916	Mycobacterium_tuberculosis_complex_2	Negative	Negative	+	++	Pulmonary tuberculosis	Training Cohort	Negative	NA	NA	No history of smoking
20211126MCX009	ZY3241	20211126	Mycobacterium_tuberculosis_complex_2	Negative	Negative	+	++	Pulmonary tuberculosis	Training Cohort	Negative	NA	NA	History of smoking
230530MCX00020	ZY15069	20230530	Mycobacterium_tuberculosis_complex_ 170,727	Negative	Negative	Negative	Negative	Pulmonary tuberculosis	Validation Cohort	Negative	NA	NA	No history of smoking
20210604MCX007	ZY928	20210604	Mycobacterium_tuberculosis_complex_1008	Mycobacterium_tuberculosis_complex_19	Acid-fast bacilli	++	++	Pulmonary tuberculosis	Training Cohort	Negative	NA	NA	History of smoking
20211204MCX004	ZY3357	20211204	Mycobacterium_tuberculosis_complex_47	Negative	Negative	Negative	++	Pulmonary tuberculosis	Training Cohort	Negative	NA	NA	History of smoking
20211207MCX007	ZY3378	20211207	Mycobacterium_tuberculosis_complex_484	Negative	Acid-fast bacilli	++	++	Pulmonary tuberculosis	Training Cohort	Negative	NA	NA	History of smoking
20211216MCX010	ZY3510	20211216	Mycobacterium_tuberculosis_complex_7	Mycobacterium_tuberculosis_complex_1	Acid-fast bacilli	+	Negative	Pulmonary tuberculosis	Validation Cohort	Negative	NA	NA	No history of smoking
20210713MCX010	ZY1355	20210713	Mycobacterium_tuberculosis_complex_194	Negative	Negative	+	++	Pulmonary tuberculosis	Training Cohort	Negative	NA	NA	No history of smoking
20210430MCX011	ZY587	20210430	Mycobacterium_tuberculosis_complex_2132	Negative	Acid-fast bacilli	Negative	++	Pulmonary tuberculosis	Training Cohort	Negative	NA	NA	History of smoking
20211104MCX017	ZY2904	20211104	Mycobacterium_tuberculosis_complex_269	Negative	Negative	++	Negative	Pulmonary tuberculosis	Training Cohort	Negative	NA	NA	No history of smoking
20210515MCX006	ZY701	20210515	Mycobacterium_tuberculosis_complex_3177	Negative	Acid-fast bacilli	++	++	Pulmonary tuberculosis	Training Cohort	Negative	NA	NA	History of smoking
20210902MCX009	ZY2031	20210902	Mycobacterium_tuberculosis_complex_3	Negative	Negative	Negative	+	Pulmonary tuberculosis	Training Cohort	Negative	NA	NA	History of smoking
20211103MCX002	ZY2875	20211103	Mycobacterium_tuberculosis_complex_5	Negative	Mycobacterium_tuberculosis	Negative	++	Pulmonary tuberculosis	Training Cohort	Negative	NA	NA	No history of smoking
20210622MCX006	ZY1107	20210622	Mycobacterium_tuberculosis_complex_1	Negative	Negative	Negative	++	Pulmonary tuberculosis	Training Cohort	Negative	NA	NA	History of smoking
20211124MCX019	ZY3210	20211124	Mycobacterium_tuberculosis_complex_6, Pneumocystis_jirovecii_2	Negative	Negative	+	++	Pulmonary tuberculosis	Training Cohort	Negative	NA	NA	History of smoking
20210811MCX011	ZY1729	20210811	Mycobacterium_tuberculosis_complex_9	Negative	Negative	+	++	Pulmonary tuberculosis	Training Cohort	Negative	NA	NA	History of smoking
20211127MCX011	ZY3258	20211127	Mycobacterium_tuberculosis_complex_150	Negative	Negative	Negative	Negative	Pulmonary tuberculosis	Training Cohort	Negative	NA	NA	History of smoking
20220225MCX010	ZY4526	20220225	Mycobacterium_tuberculosis_complex_128	Negative	Negative	+	++	Pulmonary tuberculosis	Validation Cohort	Negative	NA	NA	History of smoking
20210531MCX004	ZY858	20210531	Mycobacterium_tuberculosis_complex_214, CMV_60	Negative	Negative	Negative	Negative	Pulmonary tuberculosis	Training Cohort	Negative	NA	NA	No history of smoking
230606MCX00022	ZY15276	20230606	Mycobacterium_tuberculosis_complex_4	Negative	Negative	Negative	Negative	Pulmonary tuberculosis	Validation Cohort	Negative	NA	NA	No history of smoking
20210410MCX006	ZY385	20210410	Mycobacterium_tuberculosis_complex_82	Negative	Acid-fast bacilli	++	++	Pulmonary tuberculosis	Training Cohort	Negative	NA	NA	History of smoking
20210924MCX017	ZY2345	20210924	Mycobacterium_tuberculosis_complex_9	Negative	Negative	Negative	++	Pulmonary tuberculosis	Training Cohort	Negative	NA	NA	No history of smoking
230509MCX00022	ZY14467	20230509	Mycobacterium_tuberculosis_complex_227	Negative	Negative	Negative	Negative	Pulmonary tuberculosis	Validation Cohort	Negative	NA	NA	History of smoking
20211022MCX010	ZY2706	20211022	Mycobacterium_tuberculosis_complex_31	Negative	Negative	+	++	Pulmonary tuberculosis	Training Cohort	Negative	NA	NA	No history of smoking
20220105MCX010	ZY3782	20220105	Mycobacterium_tuberculosis_complex_3	Negative	Acid-fast bacilli	Negative	Negative	Pulmonary tuberculosis	Validation Cohort	Negative	NA	NA	No history of smoking
20210922MCX010	ZY2299	20210922	Mycobacterium_tuberculosis_complex_3,418	Mycobacterium_tuberculosis_complex_4	Negative	+	++	Pulmonary tuberculosis	Training Cohort	Negative	NA	NA	History of smoking
230505MCX00035	ZY14372	20230505	Mycobacterium_tuberculosis_complex_610	Negative	Negative	Negative	Negative	Pulmonary tuberculosis	Validation Cohort	Negative	NA	NA	History of smoking
230512MCX00018	ZY14562	20230512	Mycobacterium_tuberculosis_complex_15	Negative	Negative	Negative	Negative	Pulmonary tuberculosis	Validation Cohort	Negative	NA	NA	History of smoking
230526MCX00012	ZY14955	20230526	Mycobacterium_tuberculosis_complex_14	Negative	Negative	Negative	Negative	Pulmonary tuberculosis	Validation Cohort	Negative	NA	NA	No history of smoking
20210719MCX006	ZY1413	20210719	Mycobacterium_tuberculosis_complex_47	Negative	Acid-fast bacilli	++	++	Pulmonary tuberculosis	Training Cohort	Negative	NA	NA	History of smoking
20210828MCX008	ZY1977	20210828	Mycobacterium_tuberculosis_complex_280, Pneumocystis_jirovecii_7	Pneumocystis_jirovecii_131	Negative	++	Negative	Pulmonary tuberculosis	Training Cohort	Negative	NA	NA	History of smoking
230504MCX00021	ZY14316	20230504	Mycobacterium_tuberculosis_complex_9	Negative	Negative	Negative	Negative	Pulmonary tuberculosis	Validation Cohort	Negative	NA	NA	History of smoking
20210825MCX012	ZY1936	20210825	Mycobacterium_tuberculosis_complex_8,330	Negative	Acid-fast bacilli	+	++	Pulmonary tuberculosis	Training Cohort	Negative	NA	NA	History of smoking
20210629MCX009	ZY1191	20210629	Mycobacterium_tuberculosis_complex_1,637	Negative	Mycobacterium_tuberculosis	Negative	Negative	Pulmonary tuberculosis	Training Cohort	Negative	NA	NA	No history of smoking
20210629MCX010	ZY1192	20210629	Mycobacterium_tuberculosis_complex_5,622	Negative	Acid-fast bacilli	+++	++	Pulmonary tuberculosis	Training Cohort	Negative	NA	NA	History of smoking
20211112MCX010	ZY3015	20211112	Mycobacterium_tuberculosis_complex_1, Candida_albicans_482	Negative	Negative	Negative	++	Pulmonary tuberculosis	Training Cohort	Negative	NA	NA	History of smoking
20210526MCX015	ZY813	20210526	Mycobacterium_tuberculosis_complex_2	Negative	Negative	Negative	++	Pulmonary tuberculosis	Training Cohort	Negative	NA	NA	History of smoking
20210714MCX007	ZY1367	20210714	Mycobacterium_tuberculosis_complex_1	Negative	Negative	+	Negative	Pulmonary tuberculosis	Training Cohort	Negative	NA	NA	History of smoking
20211130MCX010	ZY3287	20211130	Mycobacterium_tuberculosis_complex_5	Negative	Negative	Negative	++	Pulmonary tuberculosis	Training Cohort	Negative	NA	NA	History of smoking
20220104MCX015	ZY3770	20220104	Negative	Negative	Negative	+	++	Pulmonary tuberculosis	Validation Cohort	Negative	NA	NA	History of smoking
20210630MCX014	ZY1207	20210630	Mycobacterium_tuberculosis_complex_369	Negative	Negative	Negative	++	Pulmonary tuberculosis	Training Cohort	Negative	NA	NA	History of smoking
20211103MCX005	ZY2878	20211103	Mycobacterium_tuberculosis_complex_2	Negative	Negative	Negative	++	Pulmonary tuberculosis	Training Cohort	Negative	NA	NA	No history of smoking
20210916MCX007	ZY2246	20210916	Mycobacterium_tuberculosis_complex_20	Negative	Negative	+	Negative	Pulmonary tuberculosis	Training Cohort	Negative	NA	NA	History of smoking
20211119MCX011	ZY3144	20211119	Mycobacterium_tuberculosis_complex_18	Negative	Negative	Negative	++	Pulmonary tuberculosis	Training Cohort	Negative	NA	NA	No history of smoking
20210626MCX006	ZY1164	20210626	Mycobacterium_tuberculosis_complex_1379	Mycobacterium_tuberculosis_complex_415	Negative	Negative	Negative	Pulmonary tuberculosis	Training Cohort	Negative	NA	NA	History of smoking
20210813MCX009	ZY1759	20210813	Mycobacterium_tuberculosis_complex_，71	Negative	Negative	+	Negative	Pulmonary tuberculosis	Training Cohort	Negative	NA	NA	History of smoking
20210309MCX010	ZY119	20210309	Mycobacterium_tuberculosis_complex_14	Negative	Acid-fast bacilli	+	++	Pulmonary tuberculosis	Training Cohort	Negative	NA	NA	No history of smoking
230517MCX00023	ZY14707	20230517	Mycobacterium_tuberculosis_complex_16	Negative	Negative	Negative	Negative	Pulmonary tuberculosis	Validation Cohort	Negative	NA	NA	History of smoking
20210323MCX004	ZY227	20210323	Mycobacterium_tuberculosis_complex_6,038	Negative	Acid-fast bacilli	++	Negative	Pulmonary tuberculosis	Training Cohort	Negative	NA	NA	History of smoking
20211104MCX009	ZY2896	20211104	Mycobacterium_tuberculosis_complex_14	Negative	Negative	Negative	++	Pulmonary tuberculosis	Training Cohort	Negative	NA	NA	Unknown
20211224MCX018	ZY3622	20211224	Mycobacterium_tuberculosis_complex_1,776	Mycobacterium_tuberculosis_complex_7	Mycobacterium_tuberculosis	++	++	Pulmonary tuberculosis	Validation Cohort	Negative	NA	NA	Unknown
20210422MCX007	ZY501	20210422	Mycobacterium_tuberculosis_complex_2	Negative	Negative	Negative	Negative	Pulmonary tuberculosis	Training Cohort	Negative	NA	NA	Unknown
20210914MCX012	ZY2219	20210914	Mycobacterium_tuberculosis_complex_1,179	Mycobacterium_tuberculosis_complex_8	Acid-fast bacilli	+++	Negative	Pulmonary tuberculosis	Training Cohort	Negative	NA	NA	No history of smoking
20211022MCX016	ZY2712	20211022	Mycobacterium_tuberculosis_complex_201	Mycobacterium_tuberculosis_complex_2	Negative	Negative	++	Pulmonary tuberculosis	Training Cohort	Negative	NA	NA	No history of smoking
20211118MCX015	ZY3129	20211118	Mycobacterium_tuberculosis_complex_148	Negative	Negative	+	++	Pulmonary tuberculosis	Training Cohort	Negative	NA	NA	No history of smoking
20220127MCX026	ZY4144	20220127	Negative	Negative	Negative	Negative	++	Pulmonary tuberculosis	Validation Cohort	Negative	NA	NA	Unknown
20211022MCX006	ZY2702	20211022	Mycobacterium_tuberculosis_complex_3,873	Mycobacterium_tuberculosis_complex_5	Acid-fast bacilli	+++	++	Pulmonary tuberculosis	Training Cohort	Negative	NA	NA	History of smoking
230518MCX00014	ZY14730	20230518	Mycobacterium_tuberculosis_complex_237	Negative	Negative	Negative	Negative	Pulmonary tuberculosis	Validation Cohort	Negative	NA	NA	History of smoking
20211123MCX011	ZY3187	20211123	Mycobacterium_tuberculosis_complex_38	Negative	Acid-fast bacilli	+	++	Pulmonary tuberculosis	Training Cohort	Negative	NA	NA	Unknown
20210723MCX017	ZY1473	20210723	Mycobacterium_tuberculosis_complex_6	Negative	Negative	Negative	++	Pulmonary tuberculosis	Training Cohort	Negative	NA	NA	No history of smoking
20210831MCX008	ZY2002	20210831	Mycobacterium_tuberculosis_complex_6,552	Mycobacterium_tuberculosis_complex_74	Acid-fast bacilli	++	++	Pulmonary tuberculosis	Training Cohort	Negative	NA	NA	No history of smoking
20211008MCX018	ZY2496	20211008	Mycobacterium_tuberculosis_complex_16	Negative	Negative	+	++	Pulmonary tuberculosis	Training Cohort	Negative	NA	NA	Unknown
230606MCX00030	ZY15284	20230606	Mycobacterium_tuberculosis_complex_1,080	Negative	Negative	Negative	Negative	Pulmonary tuberculosis	Validation Cohort	Negative	NA	NA	History of smoking

## Sheet: Data S2
Table S2. Features of Model I-VI among all classifiers
Classifiers	Model	Features	Lung Cancer vs Pulmonary Infection	Lung Cancer vs Bacterial Infection	Lung Cancer vs Fungal Infection	Lung Cancer vs Pulmonary Tuberculosis
LASSO	Model Ⅰ	Microbial DNA	DNA_Escherichia_coli, DNA_Human_betaherpesvirus_7, DNA_Mycobacterium_tuberculosis, DNA_Streptococcus_oralis, DNA_Streptococcus_pneumoniae	DNA_Campylobacter_rectus, DNA_Fusobacterium_nucleatum, DNA_Haemophilus_influenzae, DNA_Mycobacterium_intracellulare, DNA_Porphyromonas_gingivalis, DNA_Pseudomonas_aeruginosa, DNA_Streptococcus_constellatus, DNA_Streptococcus_oralis	DNA_Aspergillus_fumigatus, DNA_Cryptococcus_neoformans, DNA_Escherichia_coli, DNA_Haemophilus_haemolyticus, DNA_Human_betaherpesvirus_7, DNA_Parvimonas_micra, DNA_Pseudomonas_aeruginosa, DNA_Streptococcus_intermedius, DNA_Streptococcus_oralis, DNA_Streptococcus_pneumoniae	DNA_Escherichia_coli, DNA_Human_betaherpesvirus_7, DNA_Mycobacterium_tuberculosis, DNA_Neisseria_meningitidis, DNA_Porphyromonas_gingivalis, DNA_Pseudomonas_aeruginosa
	Model Ⅱ	Microbial RNA	RNA_Acinetobacter_radioresistens, RNA_Acinetobacter_ursingii	RNA_Acinetobacter_baumannii, RNA_Acinetobacter_haemolyticus, RNA_Acinetobacter_junii, RNA_Acinetobacter_pittii, RNA_Acinetobacter_radioresistens, RNA_Acinetobacter_ursingii, RNA_Brucella_anthropi, RNA_Escherichia_coli, RNA_Fusobacterium_nucleatum	RNA_Acinetobacter_baumannii, RNA_Acinetobacter_radioresistens, RNA_Human_betaherpesvirus_5, RNA_Klebsiella_pneumoniae, RNA_Rickettsia_felis	RNA_Acinetobacter_pittii, RNA_Klebsiella_pneumoniae
	Model Ⅲ	Host gene/Immune Cell	ABCA12, ADRB3, APOBEC3B, AQP1, ARC, AREG, B3GAT1, CCL13, CD1B, CES1P1, CTSG, DAAM2, DMBT1, EEF1A2, ETV4, GLOD5, GRASP, IATPR, IFNL1, IL23R, IL24, KLK13, LGALS17A, LOC101929415, LOC105373496, LOC105378663, LOC285847, MANSC4, MAS1, MIR3149, NPIPB12, NPW, NUDT10, OR13D1, OR52B6, PGC, PLA2G2D, PLTP, PPIP5K1P1-CATSPER2, PTGDR2, SLC5A8, SLC9A3, SLIT2, SNORA49, SNORA52, SNORD166, SNORD24, SNORD67, TAS2R…	CHST2, CYP2G1P, EPHB4, FOLR3, FOXP3, KDM5D, KLK10, LOC105378663, LOC730234, MELTF-AS1, MIR5009, MKI67, SLC26A4, SLC9A3, SNORD15B, TYMS, ZFX-AS1, ZNF107	ALOX15B, AQP1, C5orf64, CEACAM21, CRYGS, CYP2A7, FABP3, FAM106A, HTR2A, KLRC3, KRT1, LGALS2, LINC00293, LIVAR, LOC110091776, MIR3149, Monocytes, OR8G5, PDCD6IPP2, PLA2G2D, PLAC8L1, PLEKHG2, PPIP5K1P1-CATSPER2, PPP2R3B, RAB40A, SIRPG-AS1, SLC29A4, SNORA44, SNORD14C, SNORD166, SNORD24, ZBTB46-AS1	B3GAT1, BTN2A2, C1orf100, CCL17, FOLR2, IKZF4, IL23R, LINC02346
	Model Ⅳ	Transposable Elements	UCON61:UCON61:Unknown	AluYb9:Alu:SINE, (GAATG)n:Satellite:Satellite, MamRep1161:TcMar-Tigger:DNA	/	AluYa5:Alu:SINE, HERVK11D:int-ERVK:LTR, SAR:Satellite:Satellite, UCON100:DNA:DNA, UCON61:UCON61:Unknown, UCON63:UCON63:Unknown, UCON67:UCON67:Unknown
	ModelⅤ	CNV-derived Tumor fraction	CNV-chr3num, CNV-chr11num, CNV-chr3percent	CNV-chr11num	CNV-chr3num, CNV-chr10num, CNV-chr3percent	CNV-chr22num
	Model Ⅵ	Integrating features of all catagories	ABCA12, ADRB3, AQP1, ARC, AREG, B3GAT1, CCL13, CD1B, CES1P1, CTSG, DAAM2, DMBT1, DNA_Mycobacterium_tuberculosis, DNA_Streptococcus_oralis, ETV4, GLOD5, GRASP, IATPR, IFNL1, IL23R, IL24, KLK13, LGALS17A, LOC101929415, LOC105373496, LOC105378663, LOC285847, MANSC4, MAS1, MIR3149, NPIPB12, NPW, NUDT10, OR13D1, OR52B6, PGC, PLA2G2D, PLTP, PPIP5K1P1-CATSPER2, PTGDR2, SLC5A8, SLC9A3, SLIT2, SNORA49, SN…	CHST2, CYP2G1P, DNA_Haemophilus_influenzae, DNA_Streptococcus_constellatus, EPHB4, FOLR3, FOXP3, KDM5D, KLK10, LOC105378663, LOC730234, MELTF-AS1, MIR5009, MKI67, SLC26A4, SLC9A3, SNORD15B, TYMS, ZFX-AS1, ZNF107	ALOX15B, AQP1, C5orf64, CEACAM21, CRYGS, CYP2A7, DNA_Cryptococcus_neoformans, DNA_Escherichia_coli, DNA_Human_betaherpesvirus_7, DNA_Pseudomonas_aeruginosa, DNA_Streptococcus_oralis, DNA_Streptococcus_pneumoniae, FABP3, FAM106A, HTR2A, KLRC3, KRT1, LINC00293, LIVAR, LOC110091776, MIR3149, Monocytes, OR8G5, PDCD6IPP2, PLA2G2D, PLAC8L1, PLEKHG2, PPIP5K1P1-CATSPER2, PPP2R3B, RNA_Human_betaherpesviru…	B3GAT1, BTN2A2, C1orf100, CCL17, DNA_Human_betaherpesvirus_7, DNA_Mycobacterium_tuberculosis, FOLR2, IKZF4, IL23R, LINC02346
Random Forest	Model Ⅰ	Microbial DNA	DNA_Streptococcus_pneumoniae, DNA_Mycobacterium_tuberculosis, DNA_Human_betaherpesvirus_7	DNA_Pseudomonas_aeruginosa, DNA_Streptococcus_oralis, DNA_Streptococcus_constellatus, DNA_Mycobacterium_intracellulare	DNA_Cryptococcus_neoformans, DNA_Pseudomonas_aeruginosa, DNA_Human_betaherpesvirus_7, DNA_Escherichia_coli	DNA_Mycobacterium_tuberculosis, DNA_Porphyromonas_gingivalis, DNA_Escherichia_coli, DNA_Human_betaherpesvirus_7, DNA_Pseudomonas_aeruginosa
	Model Ⅱ	Microbial RNA	RNA_Klebsiella_pneumoniae, RNA_Acinetobacter_haemolyticus	RNA_Acinetobacter_radioresistens, RNA_Fusobacterium_nucleatum	RNA_Acinetobacter_pittii, RNA_Human_betaherpesvirus_5	RNA_Acinetobacter_pittii
	Model Ⅲ	Host gene/Immune Cell	ULBP1, B3GAT1, CCL17, VMP1, CCL13, PPIP5K1P1-CATSPER2, SNORD15B, EEF1A2, SMTN, FAM66C, RNF114, AREG, AP1AR, JCHAIN, OR52B6, GRASP, SNORD67, ETV4, TPTE2P5, TNFRSF11A, ADRB3, SNORD166, MIR5690, CCL22	CSF3, CEP83-DT, KDM5D, HEPH, FOXP3, RPGRIP1, BUB1, B3GAT1, LINC02384, ULBP1, CCNE1, IRGC, GZMA, PCLAF, TNFRSF10B, TTTY15, SNORD53B, MIR5009, SAMD4A, SCARNA27, ETV4, CCN6, LOC100131532	PADI2, PSD, IL1A, ZNF107, TGFBR3, ZPLD2P, PDK4, ASTL, CXCL13, GCSAML-AS1, C1QL3, COL4A4, P4HA3, C19orf38, IGFBP3, TSKS, LIVAR	IKZF4, AREG, BTN2A2, ATR, AP1AR, LINC01503, TACC3, CD163L1
	Model Ⅳ	Transposable Elements	SAR:Satellite:Satellite, GSAT:centr:Satellite, UCON67:UCON67:Unknown	AluYb9:Alu:SINE, LSAU:Satellite:Satellite, GSAT:centr:Satellite	SAR:Satellite:Satellite, GSAT:centr:Satellite, LTR6A:ERV1:LTR, UCON67:UCON67:Unknown, CR1:8:Crp-CR1:LINE, UCON61:UCON61:Unknown	AluYb9:Alu:SINE, UCON67:UCON67:Unknown
	Model Ⅴ	CNV-derived Tumor fraction	CNV-chr3num, CNV-chr11num, CNV-chr3percent	CNV-chr11num	CNV-chr3num, CNV-chr10num, CNV-chr3percent	CNV-chr22num
	Model Ⅵ	Integrating features of all catagories	B3GAT1, ULBP1, GSAT:centr:Satellite, SAR:Satellite:Satellite, CCL17, CCL13, PPIP5K1P1-CATSPER2, VMP1, AREG, SNORD15B, RNF114, ETV4, FAM66C, JCHAIN, TPTE2P5, ADRB3, OR52B6, CCL22, CNV-chr3percent	CSF3, CEP83-DT, FOXP3, BUB1, LINC02384, B3GAT1, CCNE1, TTTY15, AluYb9:Alu:SINE, SNORD53B, PCLAF, ULBP1, IRGC, TNFRSF10B, CCN6, SCARNA27, GZMA, LOC100131532, SAMD4A, ETV4, MIR5009, DNA_Streptococcus_constellatus, CNV-chr11num, DNA_Streptococcus_oralis	PADI2, IL1A, ZNF107, PSD, ZPLD2P, C19orf38, C1QL3, TGFBR3, PDK4, CXCL13, ASTL, P4HA3, COL4A4, GCSAML-AS1, IGFBP3, LIVAR, GSAT:centr:Satellite, TSKS, UCON67:UCON67:Unknown, RNA_Human_betaherpesvirus_5, LTR6A:ERV1:LTR, DNA_Cryptococcus_neoformans	IKZF4, AREG, AP1AR, ATR, BTN2A2, CD163L1, TACC3, LINC01503, DNA_Mycobacterium_tuberculosis, AluYb9:Alu:SINE, UCON67:UCON67:Unknown, chr22num, DNA_Human_betaherpesvirus_7, DNA_Escherichia_coli, DNA_Pseudomonas_aeruginosa
SVM	Model Ⅰ	Microbial DNA	DNA_Streptococcus_pneumoniae, DNA_Mycobacterium_tuberculosis, DNA_Human_betaherpesvirus_7, DNA_Streptococcus_oralis, DNA_Escherichia_coli	DNA_Haemophilus_influenzae, DNA_Mycobacterium_intracellulare, DNA_Pseudomonas_aeruginosa, DNA_Streptococcus_constellatus	DNA_Cryptococcus_neoformans, DNA_Human_betaherpesvirus_7, DNA_Pseudomonas_aeruginosa	DNA_Human_betaherpesvirus_7, DNA_Mycobacterium_tuberculosis
	Model Ⅱ	Microbial RNA	RNA_Klebsiella_pneumoniae, RNA_Acinetobacter_radioresistens, RNA_Acinetobacter_haemolyticus	RNA_Acinetobacter_radioresistens, RNA_Acinetobacter_ursingii, RNA_Acinetobacter_baumannii, RNA_Fusobacterium_nucleatum	RNA_Klebsiella_pneumoniae, RNA_Acinetobacter_ursingii, RNA_Acinetobacter_baumannii, RNA_Brucella_anthropi, RNA_Acinetobacter_pittii	RNA_Acinetobacter_pittii, RNA_Brucella_anthropi, RNA_Klebsiella_pneumoniae
	Model Ⅲ	Host gene/Immune Cell	CNP, EEF1A2, OR52B6, SNORD67, PPIP5K1P1-CATSPER2, TAS2R4, AFAP1-AS1, FAM66C, SNORD15B, ADRB3, B3GAT1, AP1AR, LOC100996318	CEP83-DT, HEPH, CSF3, KDM5D, CDC25B, PCYOX1L, ACP6	C1QL3, SNORA44, LACTB2-AS1, PADI2, IL6, ZFP36, IL1B, IL1A	ADAT1, AREG, PNP, TMCO3
	Model Ⅳ	Transposable Elements	GSAT:centr:Satellite, UCON67:UCON67:Unknown	MamRep1161:TcMar-Tigger:DNA	SAR:Satellite:Satellite, AluYb8:Alu:SINE	SAR:Satellite:Satellite, HSAT5:Satellite:Satellite, UCON61:UCON61:Unknown, HSATI:Satellite:Satellite, AluYa8:Alu:SINE, (CATTC)n:Satellite:Satellite
	Model Ⅴ	CNV-derived Tumor fraction	CNV-chr3num, CNV-chr11num, CNV-chr3percent	CNV-chr11num	CNV-chr3num, CNV-chr10num, CNV-chr3percent	CNV-chr22num
	Model Ⅵ	Integrating features of all catagories	CNP, GSAT:centr:Satellite, EEF1A2, AFAP1-AS1, FAM66C, SNORD67, TAS2R4, SNORD15B, OR52B6, PPIP5K1P1-CATSPER2, CNV-chr3num	HEPH, CSF3, CEP83-DT, KDM5D, ACP6, CNV-chr11num, PCYOX1L, DNA_Pseudomonas_aeruginosa, DNA_Streptococcus_constellatus, DNA_Mycobacterium_intracellulare, DNA_Haemophilus_influenzae	C1QL3, SNORA44, LACTB2-AS1, IL6, PADI2, IL1A, ZFP36, IL1B, AluYb8:Alu:SINE, CNV-chr3percent, DNA_Human_betaherpesvirus_7, DNA_Cryptococcus_neoformans, DNA_Pseudomonas_aeruginosa, RNA_Klebsiella_pneumoniae	ADAT1, AREG, (CATTC)n:Satellite:Satellite, PNP, DNA_Human_betaherpesvirus_7, DNA_Mycobacterium_tuberculosis
XGBoost	Model Ⅰ	Microbial DNA	DNA_Streptococcus_oralis, DNA_Streptococcus_pneumoniae	DNA_Streptococcus_constellatus, DNA_Pseudomonas_aeruginosa, DNA_Fusobacterium_nucleatum	DNA_Cryptococcus_neoformans, DNA_Streptococcus_pneumoniae, DNA_Aspergillus_fumigatus, DNA_Escherichia_coli	DNA_Mycobacterium_tuberculosis, DNA_Porphyromonas_gingivalis, DNA_Human_betaherpesvirus_7, DNA_Escherichia_coli
	Model Ⅱ	Microbial RNA	RNA_Klebsiella_pneumoniae	RNA_Acinetobacter_radioresistens	RNA_Acinetobacter_pittii, RNA_Klebsiella_pneumoniae	RNA_Brucella_anthropi, RNA_Klebsiella_pneumoniae
	Model Ⅲ	Host gene/Immune Cell	PPIP5K1P1-CATSPER2, ULBP1, VMP1, B3GAT1, IL6, MATK, RNF114, NAALAD2, LOC100287846, CACNA1C, CCL17, CD9, DIPK1B	CSF3, SCARNA27, CCL3, STRIT1, SAMD4A, RPGRIP1, CCN5, SUSD4, AKAP12, CX3CR1, SLC25A30	BMS1P2, CDC42BPG, GUSBP14, IQCJ-SCHIP1-AS1, LOC100506497, LTBP1, RNF212, NUP210L	FAT3, MAMLD1, SLC24A1, TMEM126B, SLC4A10, ADAT1, ADAMTS12
	Model Ⅳ	Transposable Elements	GSAT:centr:Satellite,SAR:Satellite:Satellite, HSATI:Satellite:Satellite, UCON67:UCON67:Unknown	LSAU:Satellite:Satellite, AluYb9:Alu:SINE	SAR:Satellite:Satellite, SST1:centr:Satellite	SAR:Satellite:Satellite, UCON67:UCON67:Unknown, (CATTC)n:Satellite:Satellite, HERVK11D:int-ERVK:LTR
	Model Ⅴ	CNV-derived Tumor fraction	CNV-chr3num, CNV-chr11num, CNV-chr3percent	CNV-chr11num	CNV-chr3num, CNV-chr10num, CNV-chr3percent	CNV-chr22num
	Model Ⅵ	Integrating features of all catagories	PPIP5K1P1-CATSPER2, VMP1, ULBP1, IL6, RNF114, B3GAT1, MATK, CACNA1C, NAALAD2	CSF3, SCARNA27, RPGRIP1, AKAP12, SAMD4A, SUSD4, CCL3, CX3CR1, STRIT1, SLC25A30, CCN5	CDC42BPG, RNF212, LTBP1, IQCJ-SCHIP1-AS1, LOC100506497, BMS1P2, GUSBP14, NUP210L	ADAT1, SLC24A1, SLC4A10, TMEM126B, FAT3, MAMLD1, ADAMTS12

## Sheet: Data S3
Data S3. Microbiological results and diagnosis of Negative Control patients
Patients ID	Collecation Date	Library ID	BAL microbiology	mNGS DNA Pathogen_Reads number	mNGS RNA Pathogen_Reads number	Diagnosis
220406MCX00010	20220406	ZY5162	Negative	Negative	Negative	idiopathic pulmonary fibrosis
20210611MCX006	20210611	ZY1009	Negative	Negative	Negative	organising pneumonia
20210825MCX011	20210825	ZY1935	Negative	Negative	Negative	organising pneumonia
20220317MCX017	20220317	ZY4871	Negative	Negative	Negative	organising pneumonia
20220303MCX007	20220303	ZY4623	Negative	Negative	Negative	hypersensitivity pneumonitis
220422MCX00014	20220422	ZY5484	Negative	CMV_24	Negative	organising pneumonia
20210520MCX014	20210520	ZY750	Negative	Negative	Negative	hypersensitivity pneumonitis
20210813MCX014	20210813	ZY1764	Negative	EBV_1	Negative	idiopathic pulmonary fibrosis
20210920MCX011	20210920	ZY2286	Negative	Negative	Negative	hypersensitivity pneumonitis
20220110MCX013	20220110	ZY3854	Negative	HHV7_3	Negative	organising pneumonia
20220217MCX018	20220217	ZY4412	Negative	Negative	Negative	organising pneumonia
20220218MCX013	20220218	ZY4430	Negative	Negative	Negative	hypersensitivity pneumonitis
20220315MCX021	20220315	ZY4833	Negative	Negative	Negative	hypersensitivity pneumonitis
220412MCX00011	20220412	ZY5275	Negative	Negative	Negative	hypersensitivity pneumonitis
220421MCX00016	20220421	ZY5462	Negative	Negative	Negative	hypersensitivity pneumonitis
220615MCX00015	20220615	ZY6502	Negative	Negative	Negative	benign pulmonary nodules
220428MCX00013	20220428	ZY5595	Negative	Negative	Negative	benign pulmonary nodules
220517MCX00014	20220517	ZY5921	Negative	Negative	Negative	hypersensitivity pneumonitis
20210414MCX011	20210414	ZY427	Negative	Negative	Negative	benign pulmonary nodules
20211103MCX003	20211103	ZY2876	Negative	HHV6B_725	HHV6B_2	organising pneumonia
20220125MCX017	20220125	ZY4101	Negative	Negative	Negative	hypersensitivity pneumonitis
20220310MCX025	20220310	ZY4744	Negative	Negative	Negative	benign pulmonary nodules
20220330MCX012	20220330	ZY5062	Negative	EBV_4	Negative	pulmonary alveolar proteinosis
20220331MCX010	20220331	ZY5079	Negative	HHV7_3	Negative	pulmonary atelectasis
20210810MCX011	20210810	ZY1709	Negative	CMV_5	Negative	benign pulmonary nodules
20211021MCX014	20211021	ZY2693	Negative	Negative	Negative	benign pulmonary nodules
20210727MCX013	20210727	ZY1521	Negative	Negative	Negative	benign pulmonary nodules
20210612MCX014	20210612	ZY1027	Negative	Negative	Negative	pulmonary alveolar proteinosis
20210908MCX018	20210908	ZY2131	Negative	CMV_3	Negative	pulmonary alveolar proteinosis
20210819MCX014	20210819	ZY1851	Negative	Negative	Negative	pulmonary atelectasis
20211118MCX007	20211118	ZY3121	Negative	Negative	Negative	benign pulmonary nodules
20211124MCX015	20211124	ZY3206	Negative	EBV_3	Negative	idiopathic pulmonary fibrosis
